# Supplementary material for: Nickel-catalyzed cross-coupling of aryltrimethylammonium triflates and amines
Source: Royal Society of Chemistry journal article supplement (doi:10.1039/c3ob41989d), 2013-12-04

Electronic Supplementary Information

## **Nickel-Catalyzed Cross-Coupling of Aryltrimethylammonium Triflates and Amines**

Xue-Qi Zhang and Zhong-Xia Wang\*

CAS Key Laboratory of Soft Matter Chemistry and Department of Chemistry, University of Science and Technology of China, Hefei, Anhui 230026, People's Republic of China.

E-mail: zwxwang@ustc.edu.cn

**Copies of  $^1\text{H}$  and  $^{13}\text{C}$  NMR spectra of the coupling products**

(1) 4-(3-Methoxyphenyl)morpholine (**3a**)

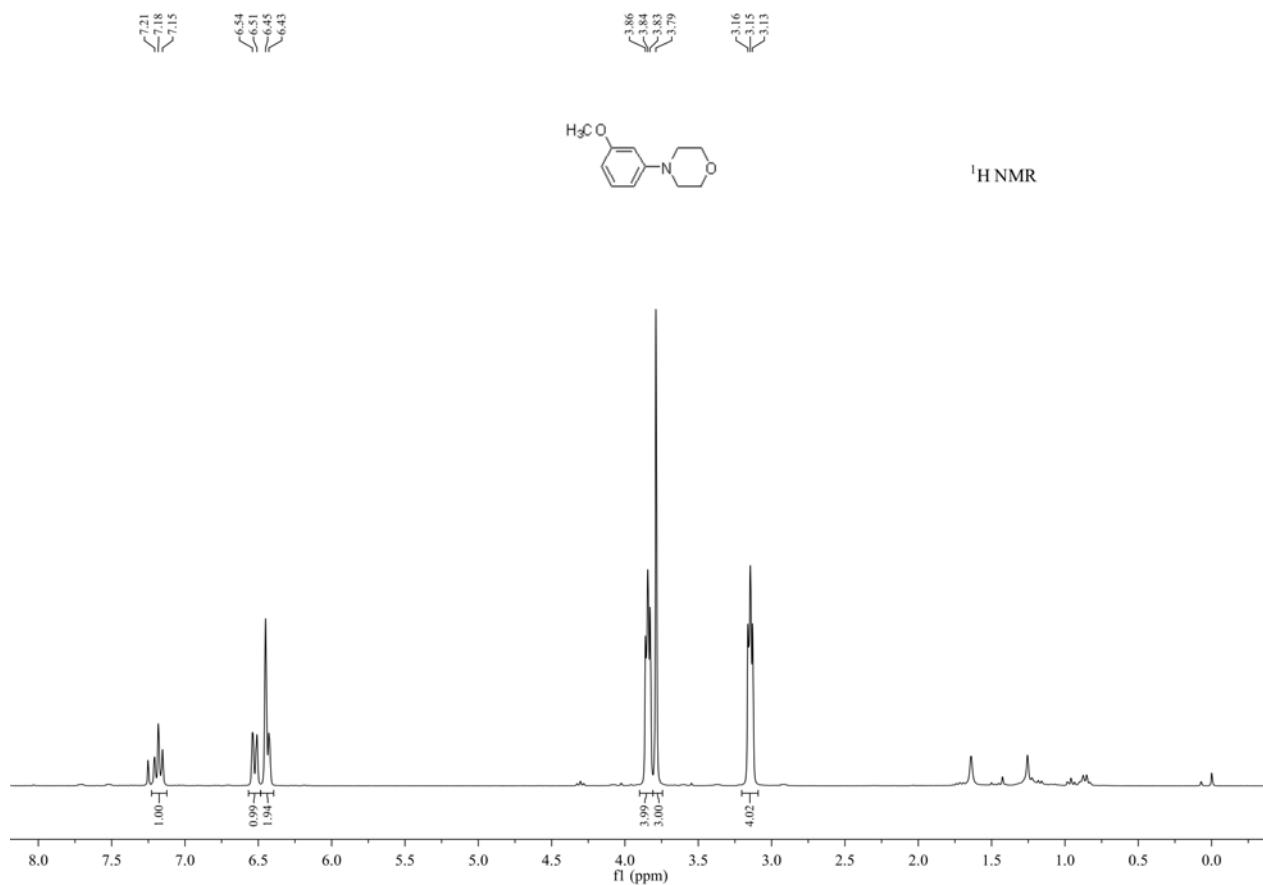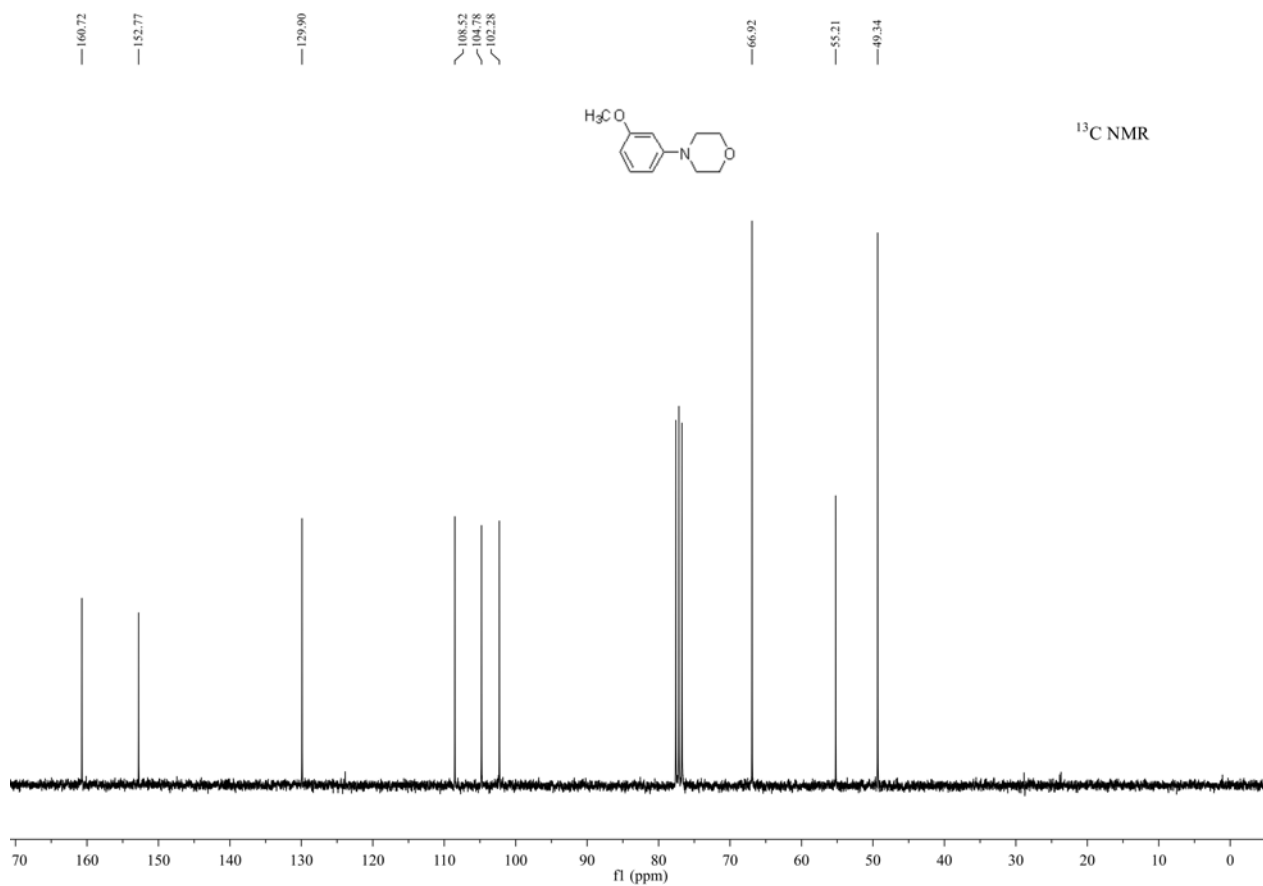

(2) 4-Phenylmorpholine (**3b**)

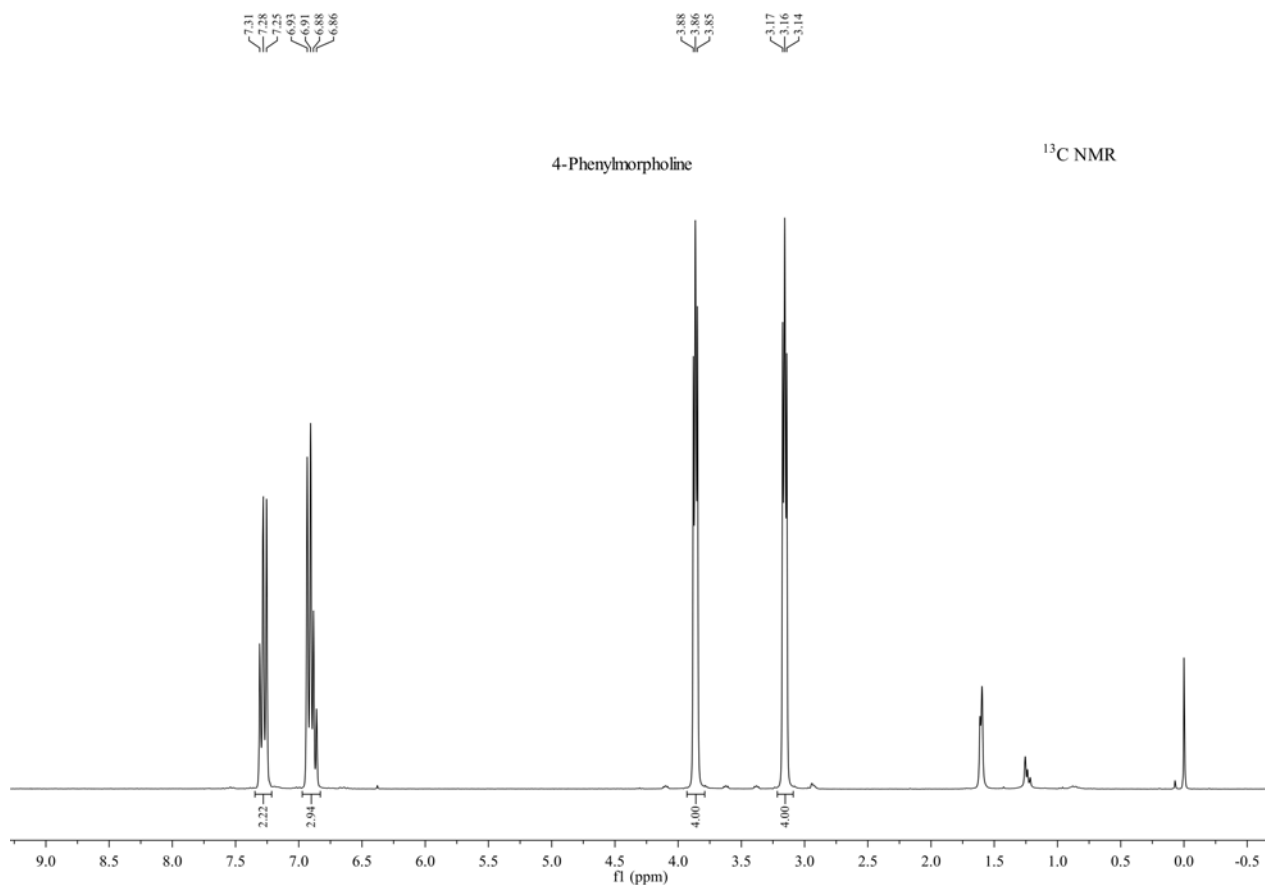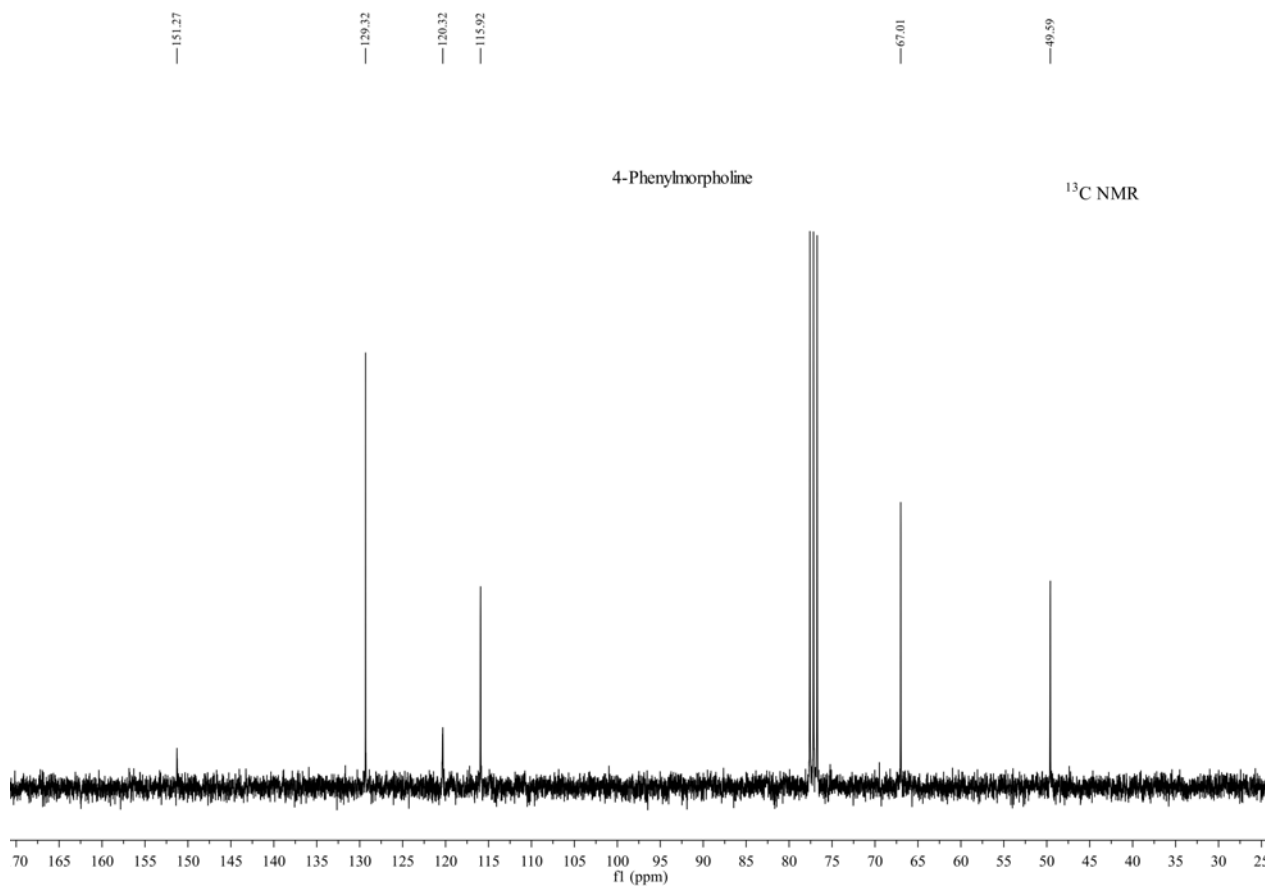

(3) 4-(4'-Methoxybiphenyl-4-yl)morpholine (**3c**)

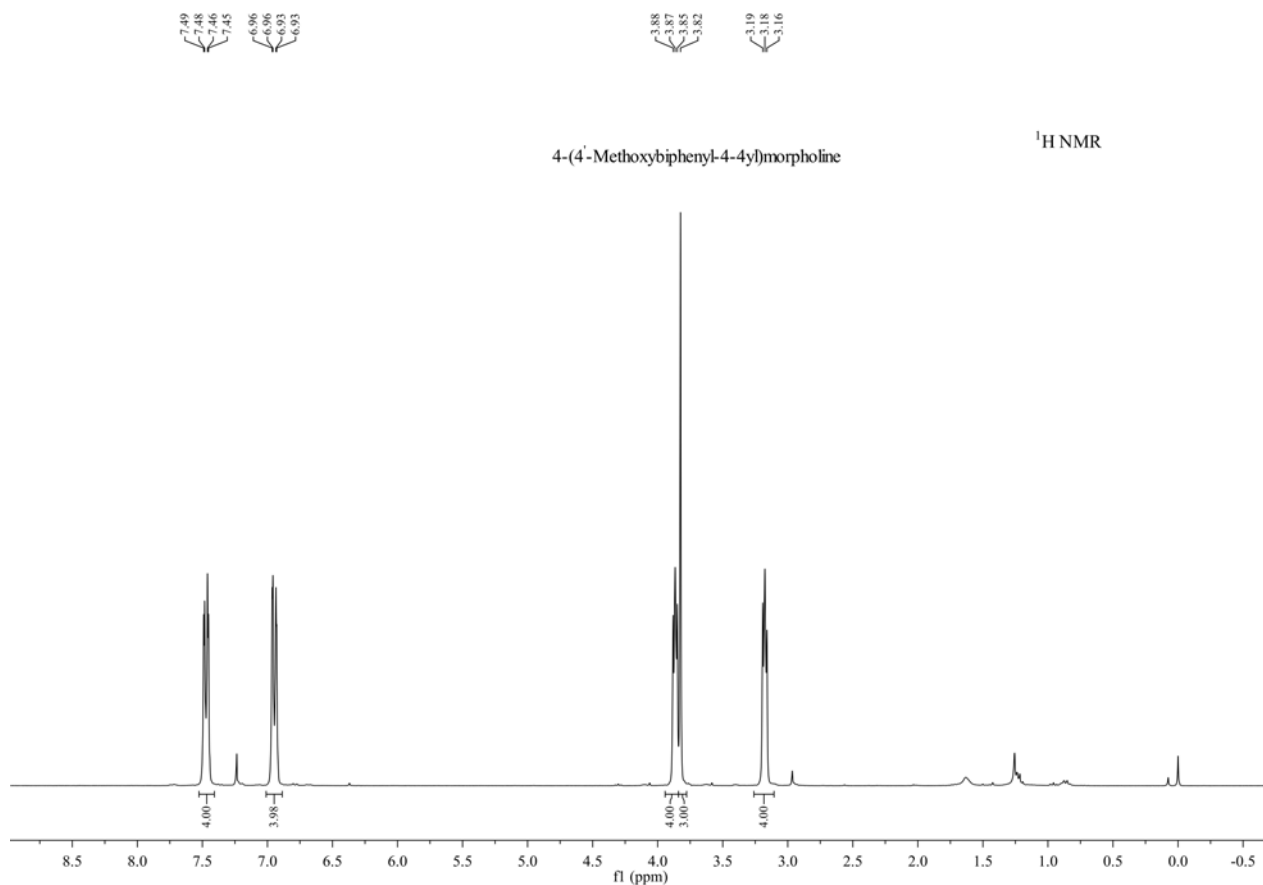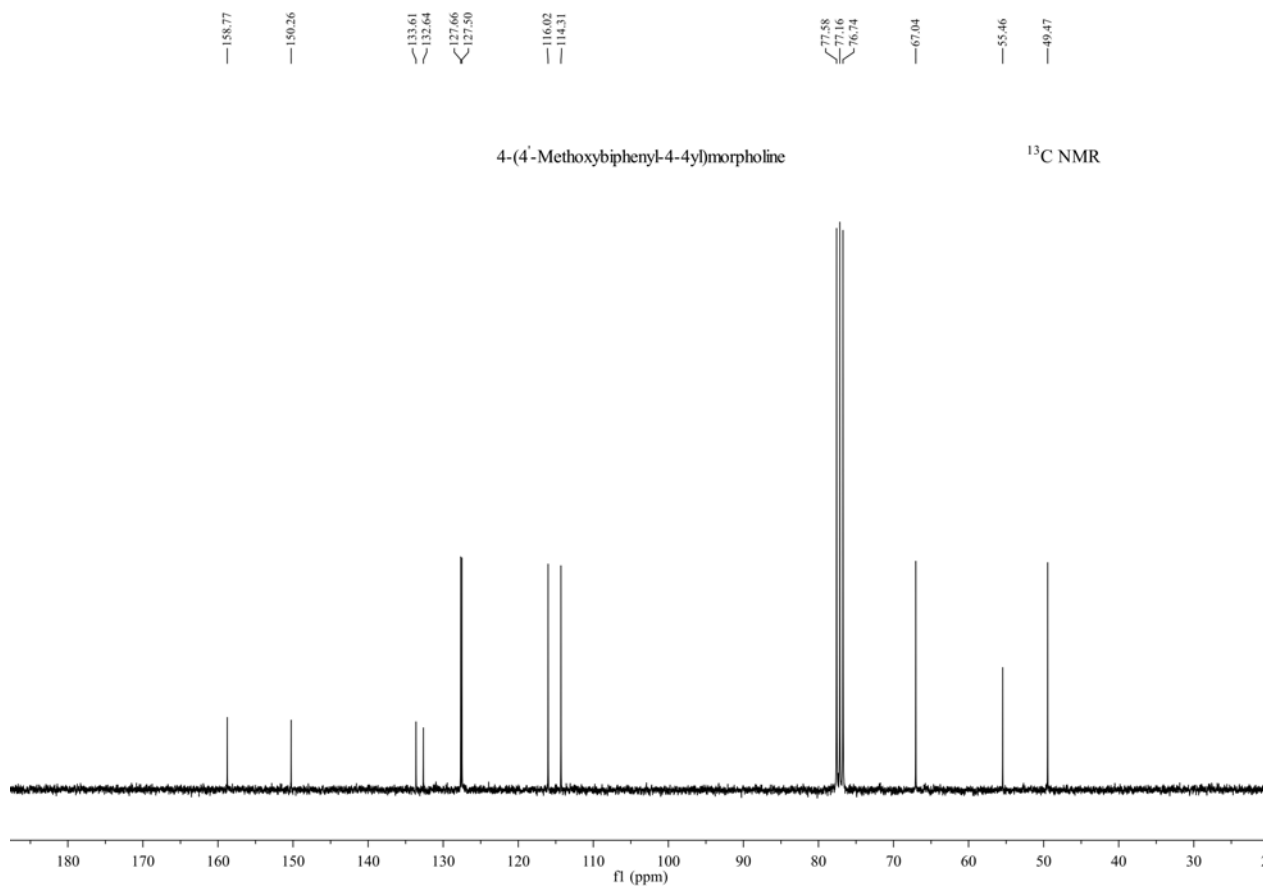

(4) 4-(4-Methoxyphenyl)morpholine (**3d**)

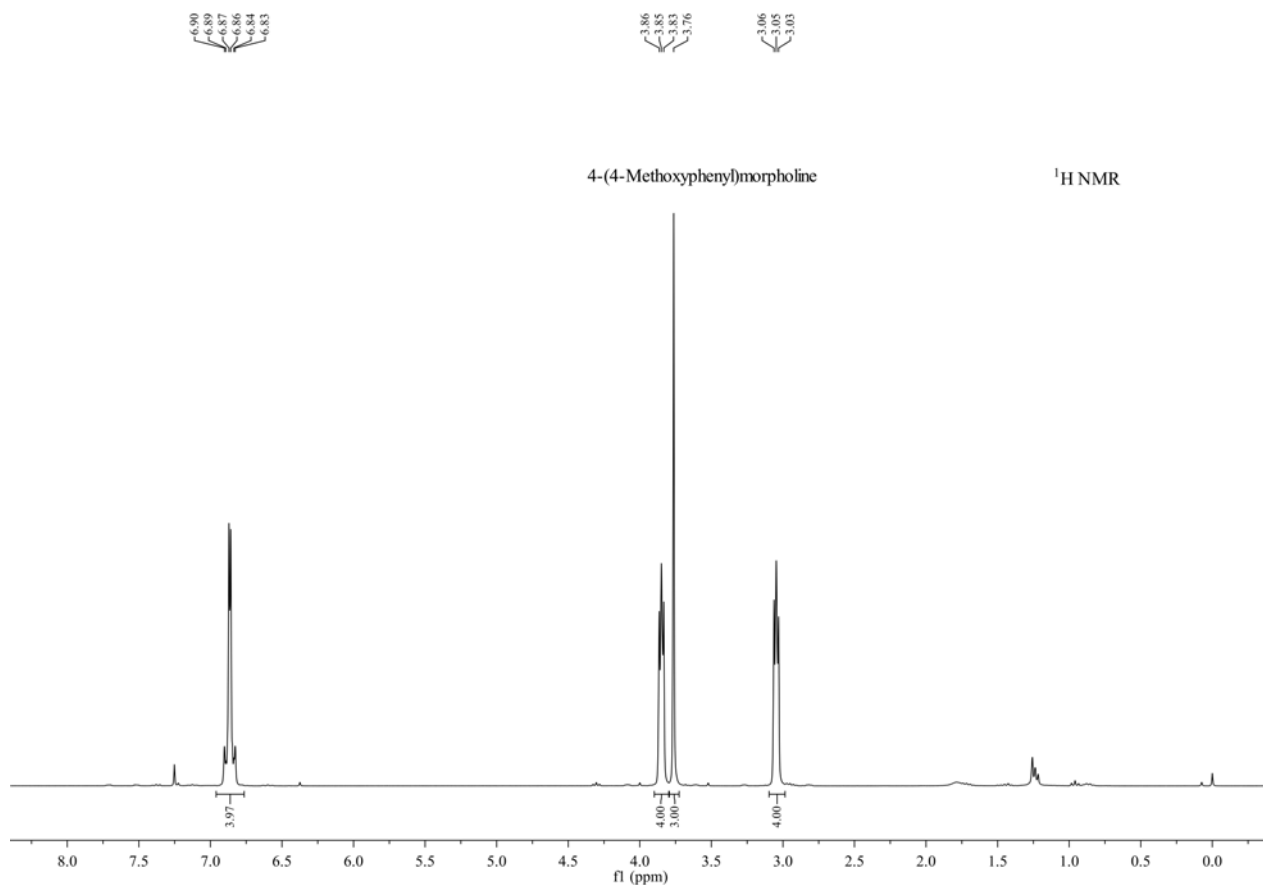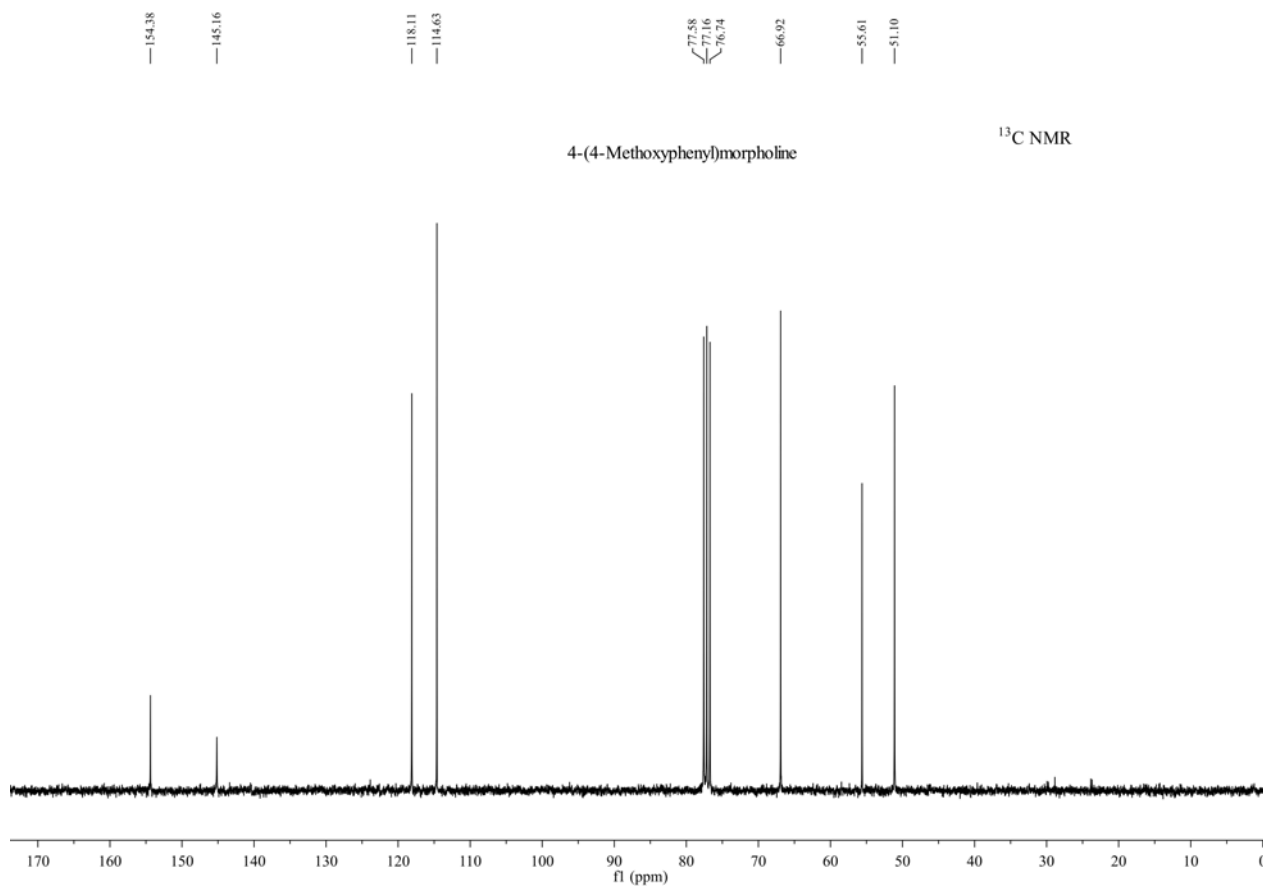

(5) 4-(2-Methylphenyl)morpholine (**3e**)

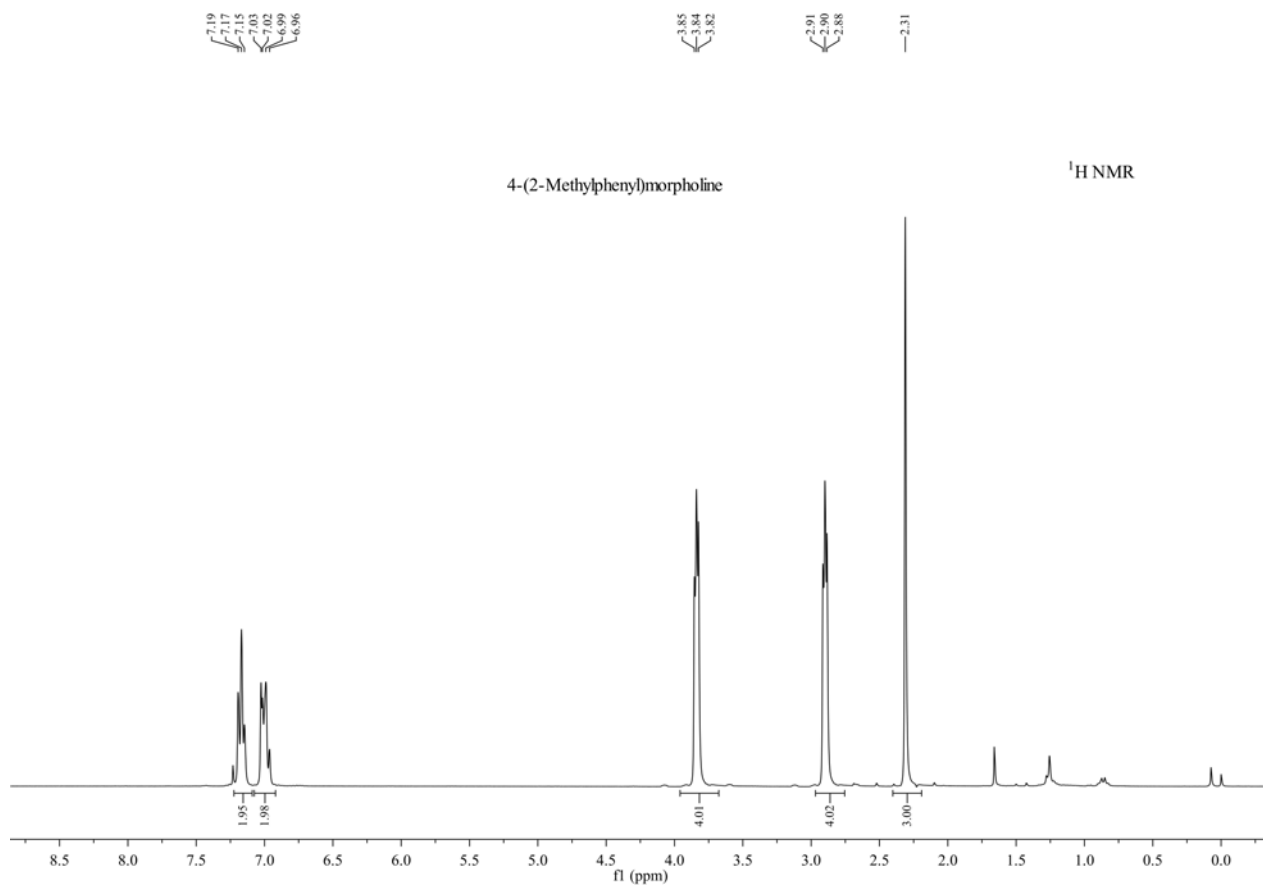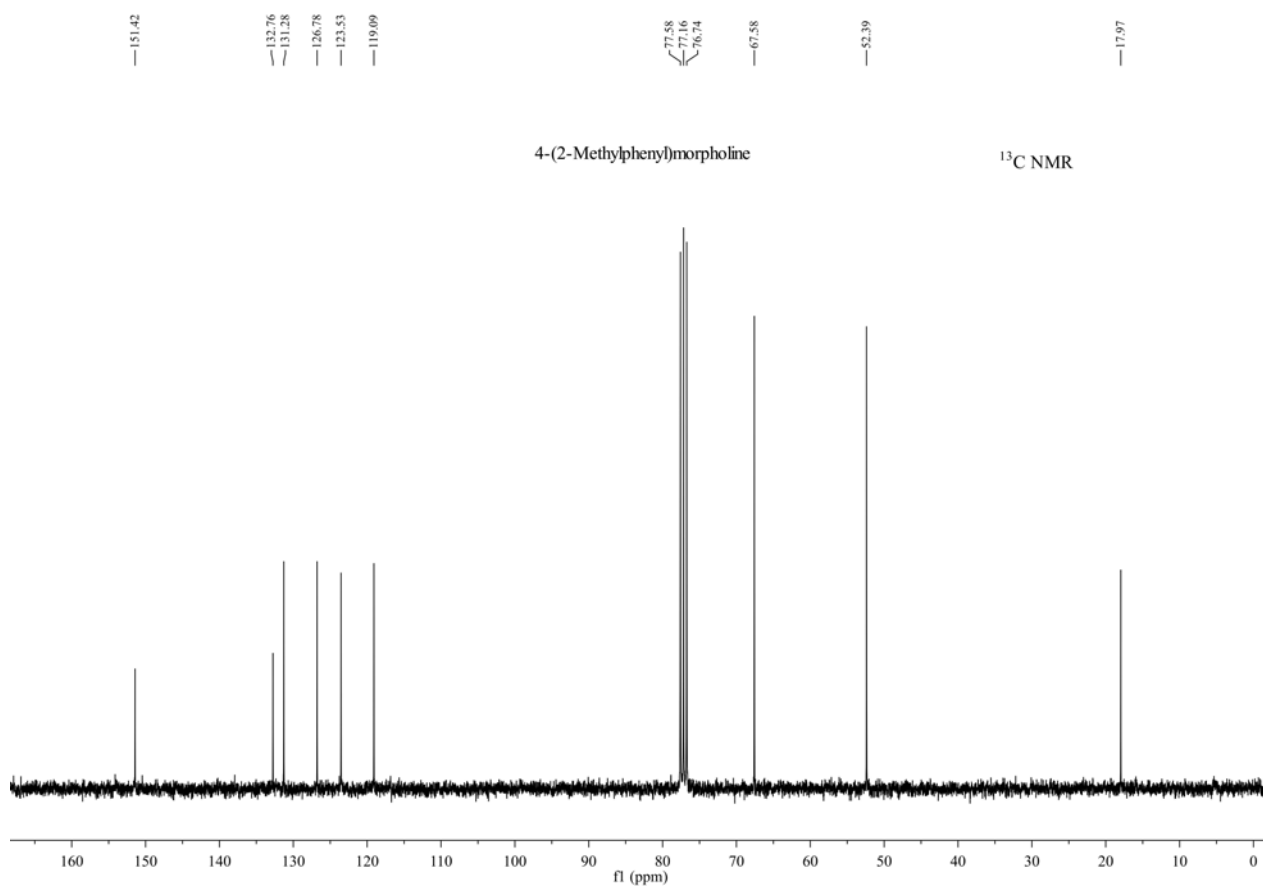

(6) 4-(Naphthalen-1-yl)morpholine (**3f**)

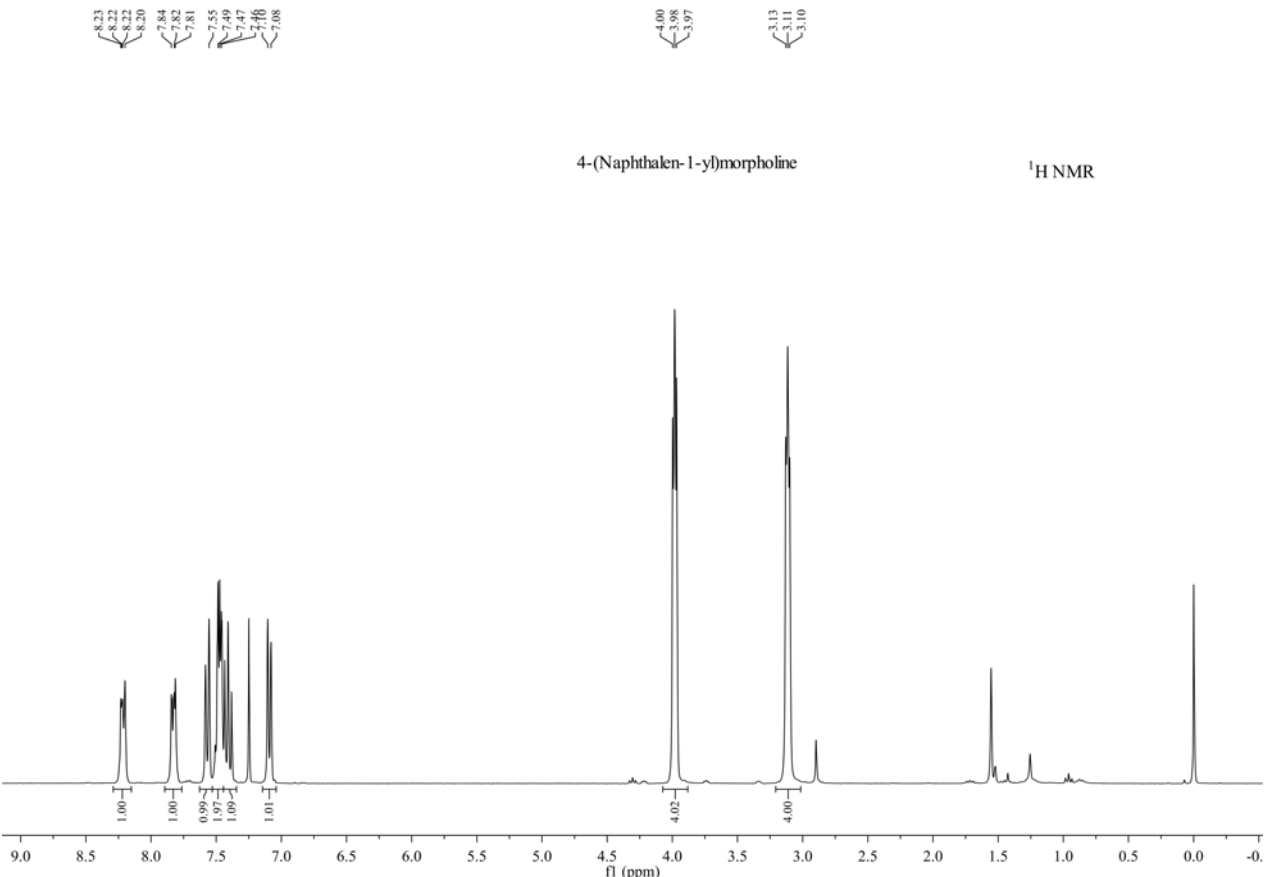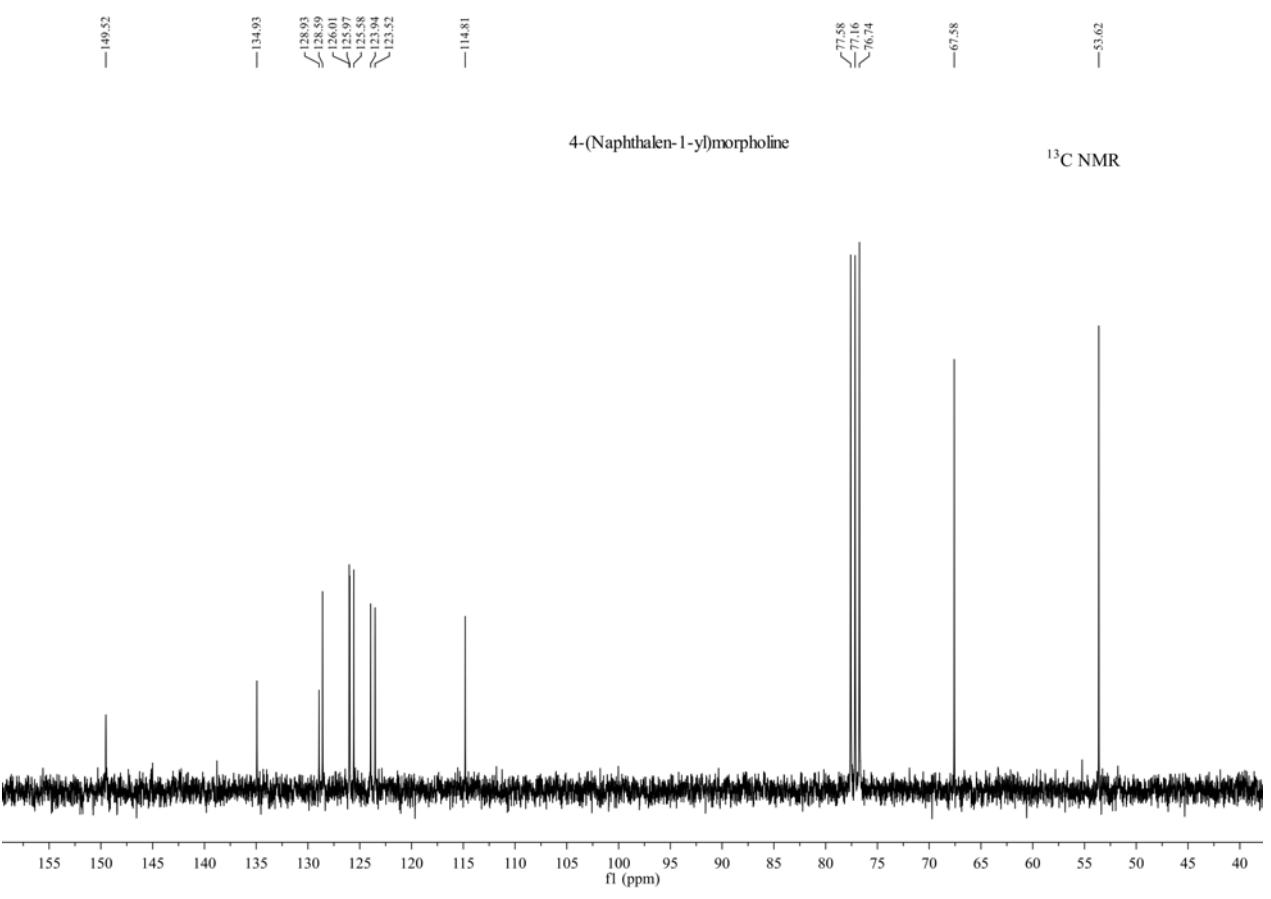

(7) 4-(Naphthalen-2-yl)morpholine (**3g**)

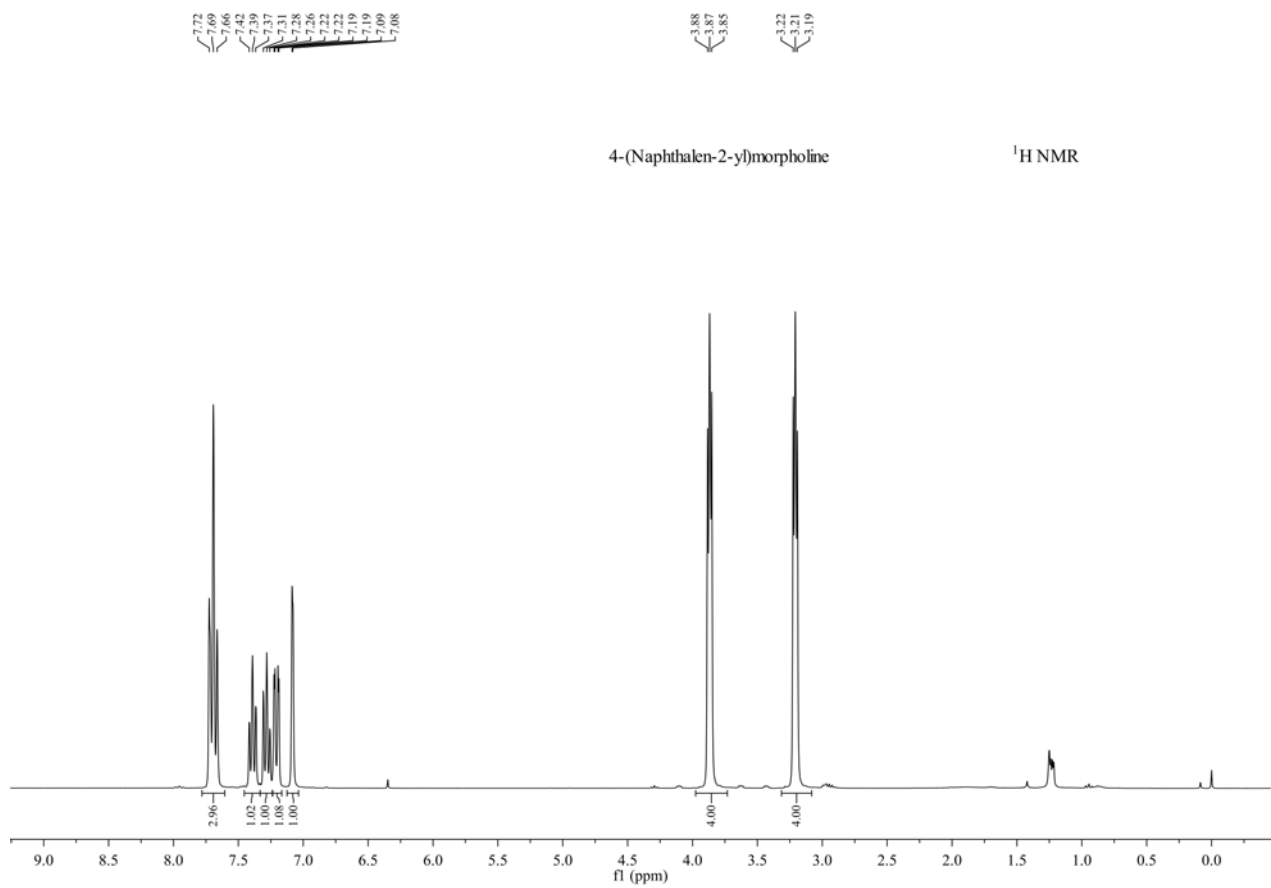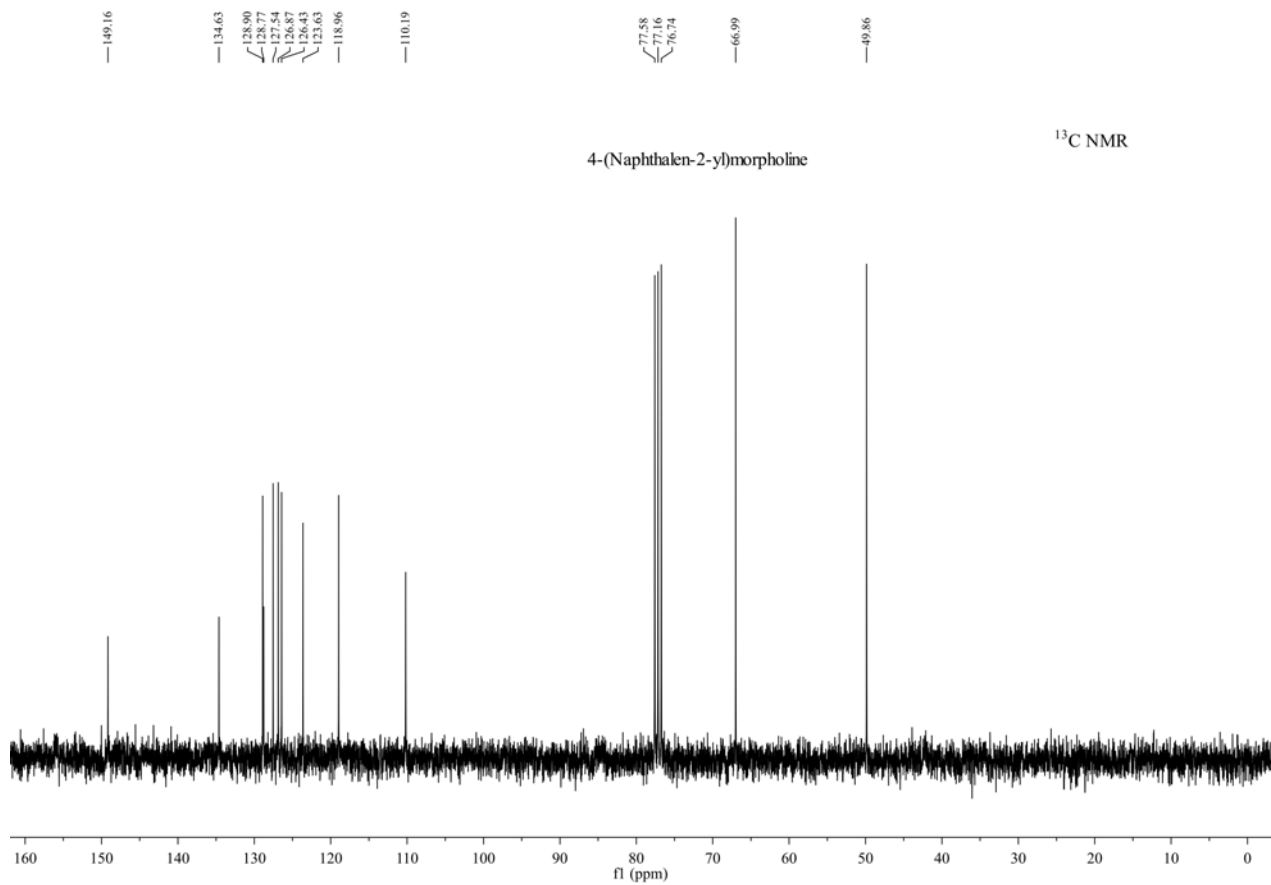



(8) 4-(4-Fluorophenyl)morpholine (**3h**)

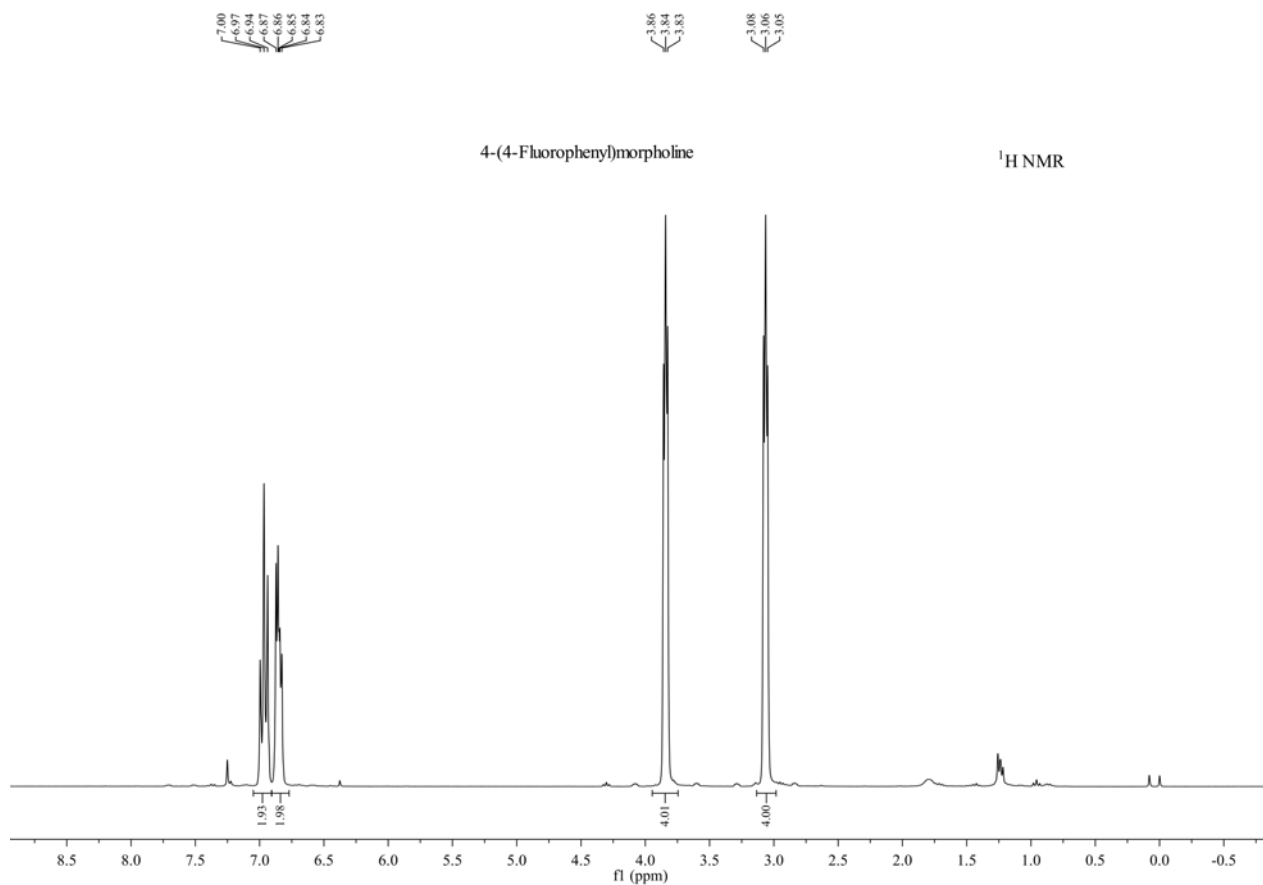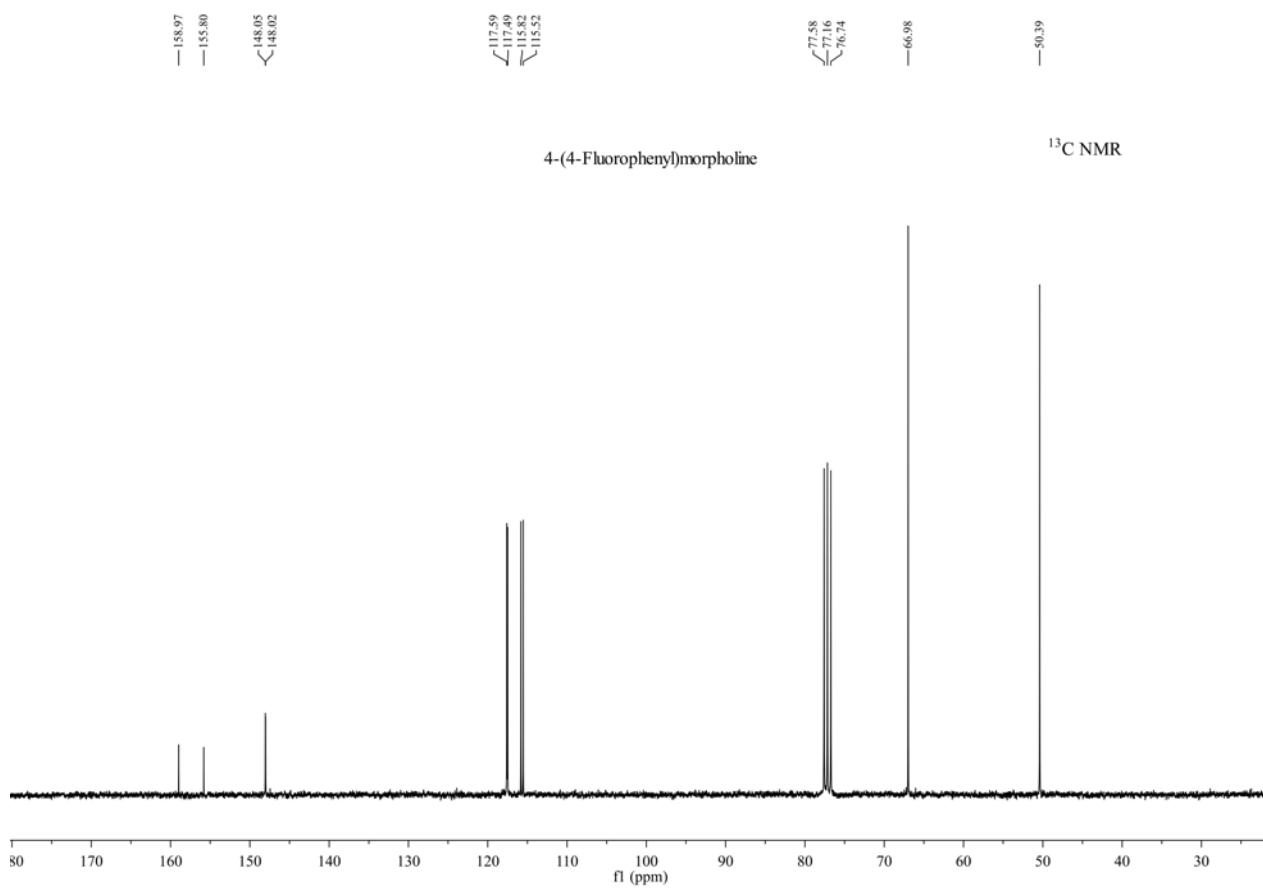

(9) 4-(4-Trifluoromethylphenyl)morpholine (**3i**)

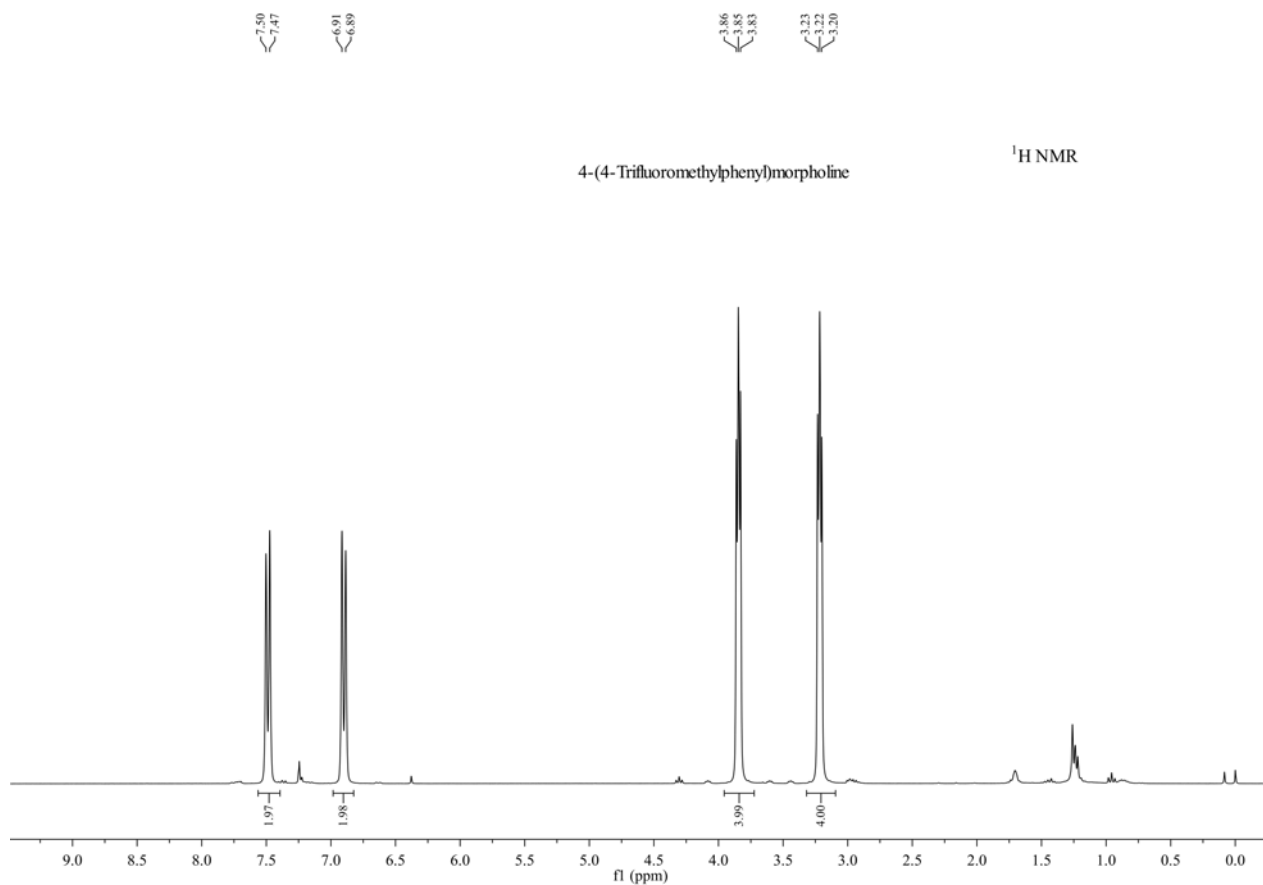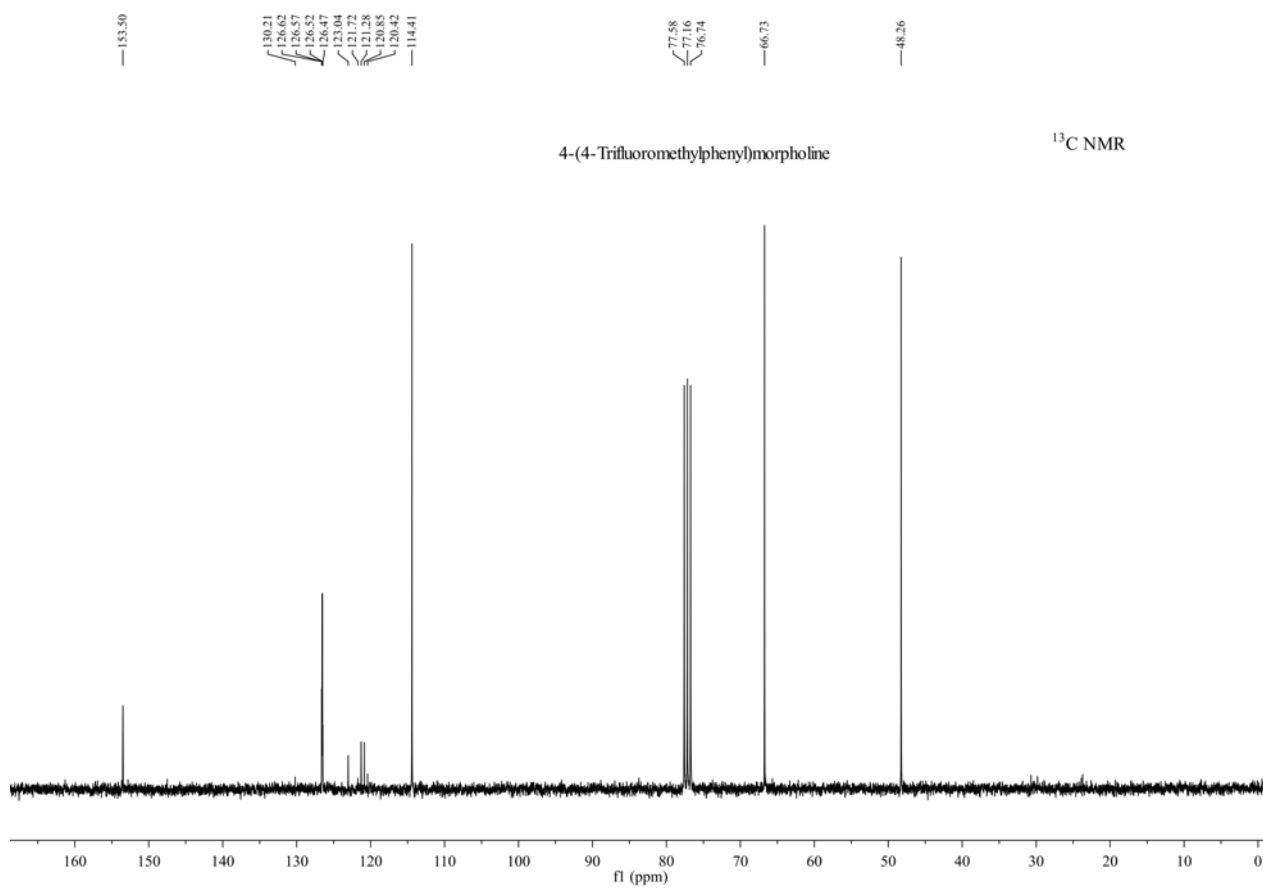

(10) (4-Morpholinophenyl)-phenyl-methanone (**3j**)

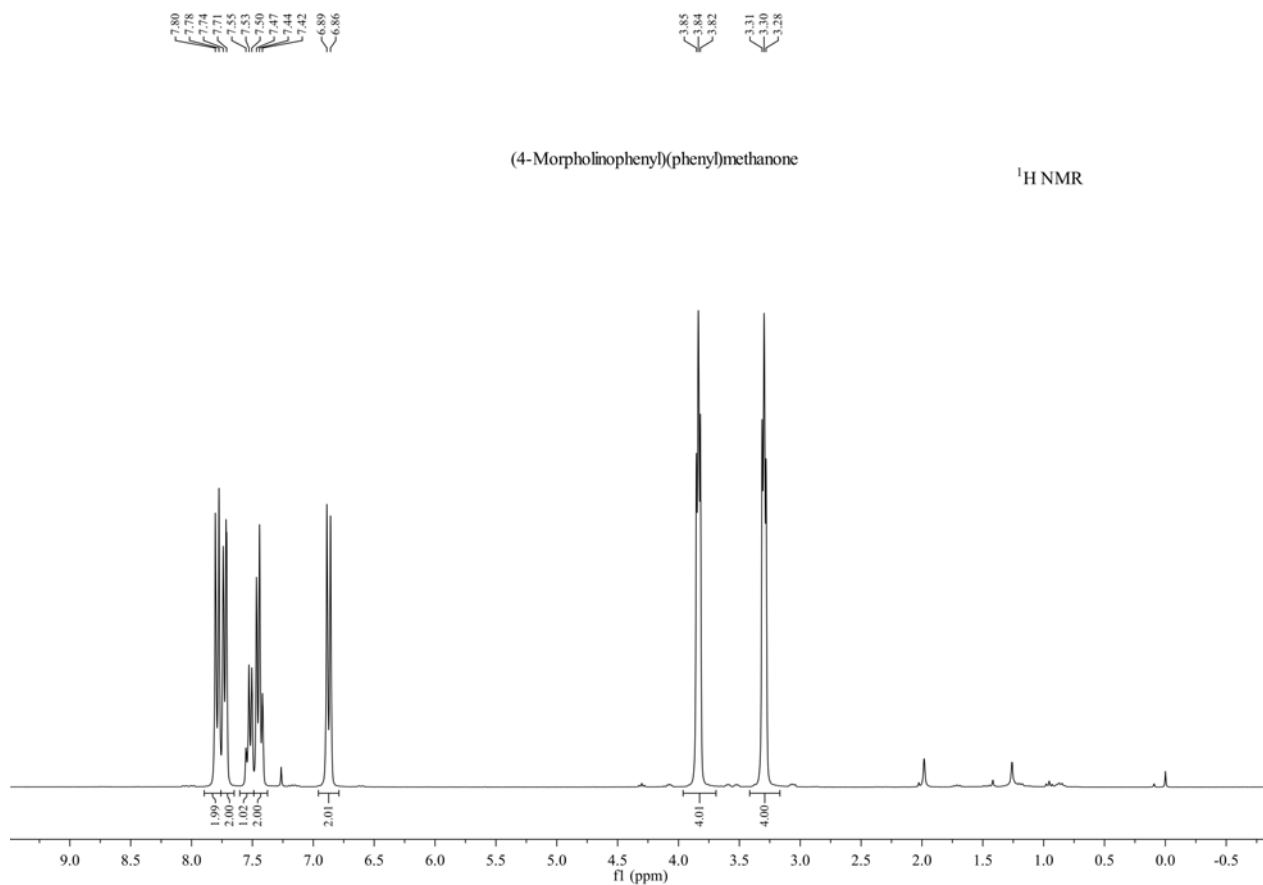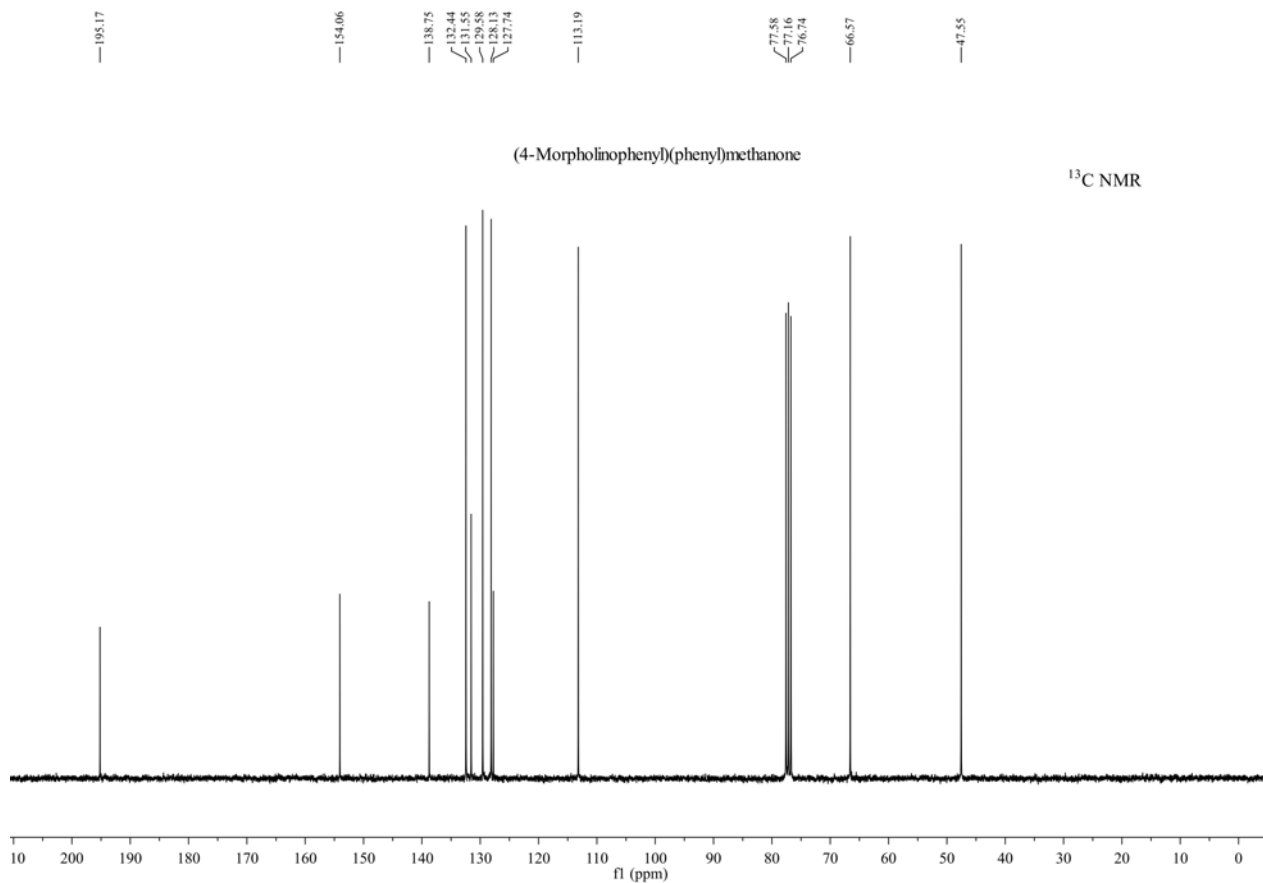

(11) *N,N*-Diethyl-4-morpholinobenzamide (**3k**)

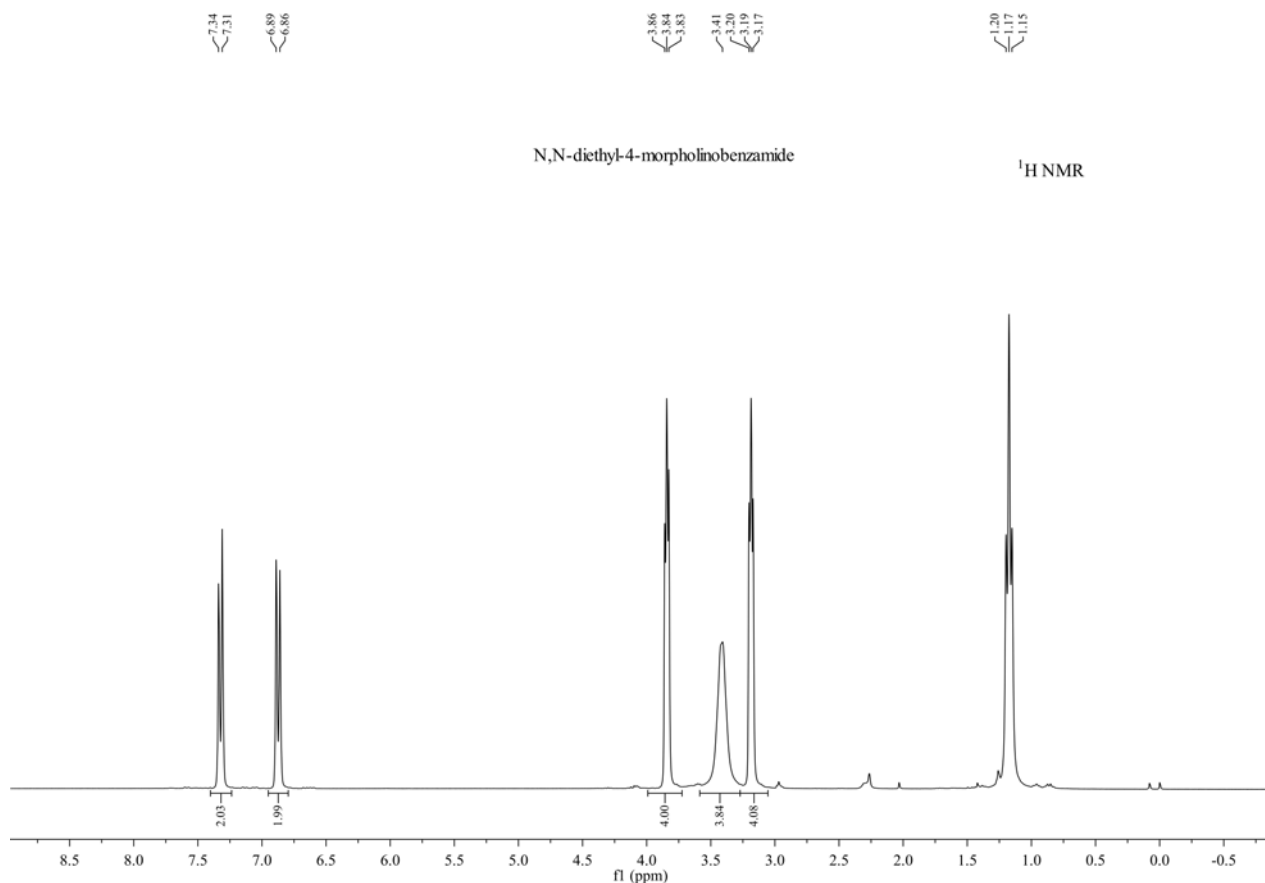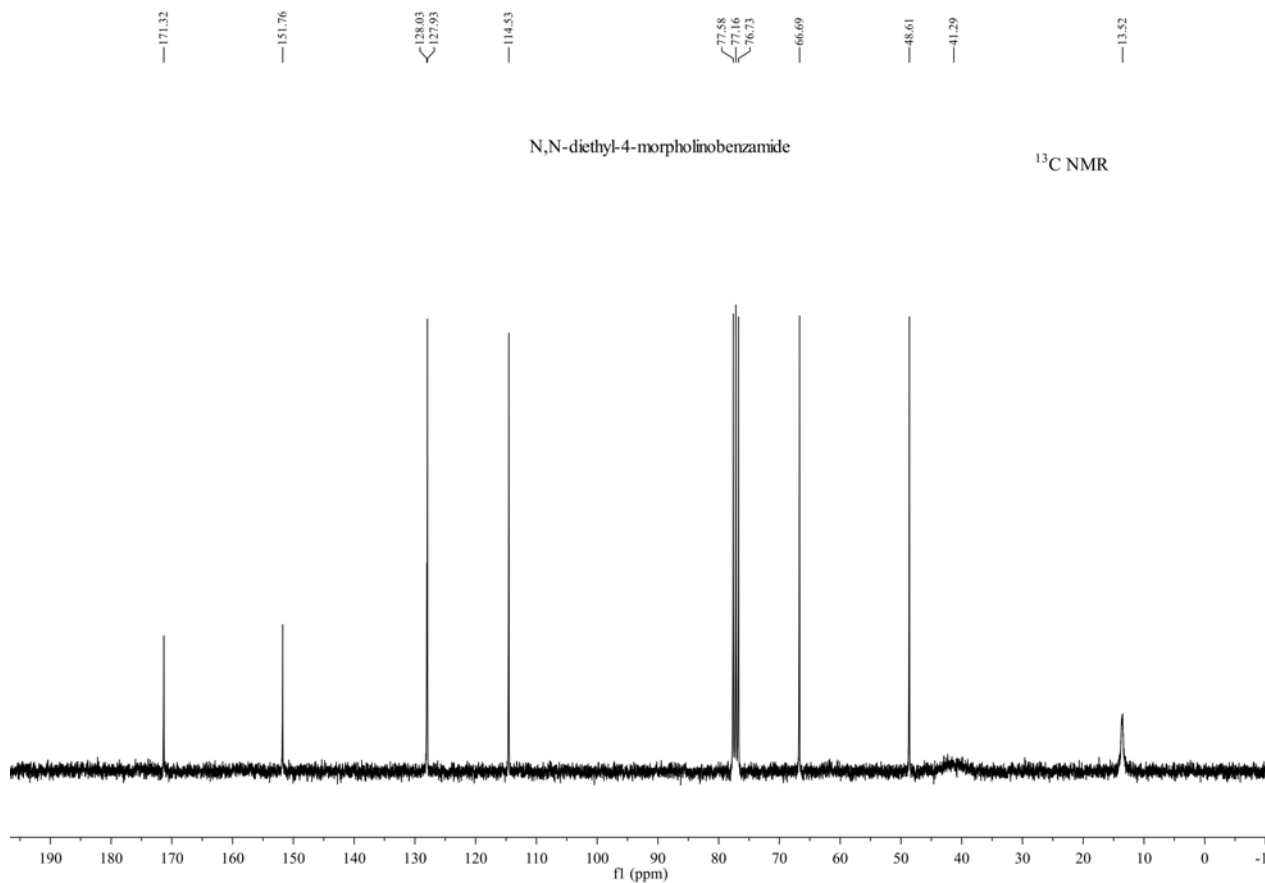

(12) 4-(Pyridin-2-yl)morpholine (**3l**)

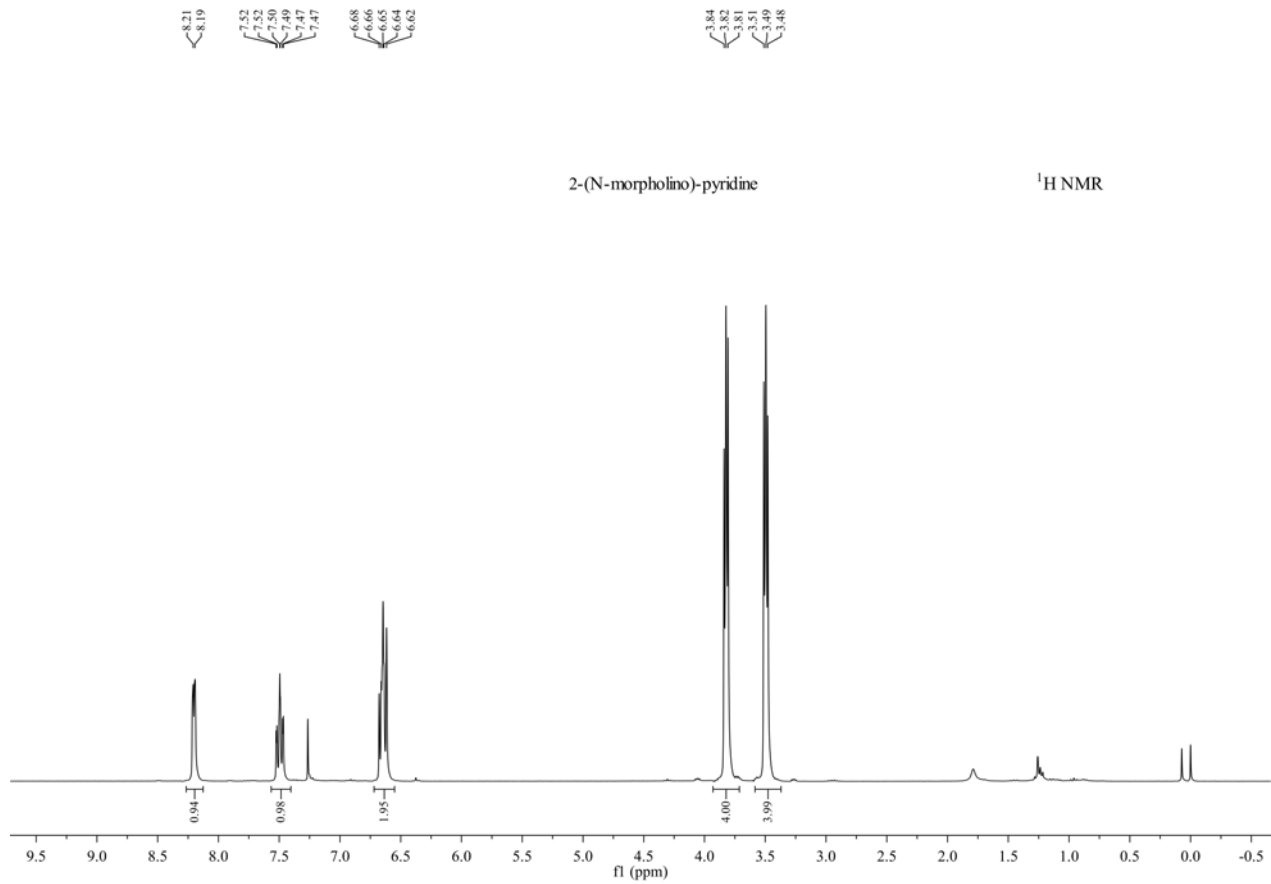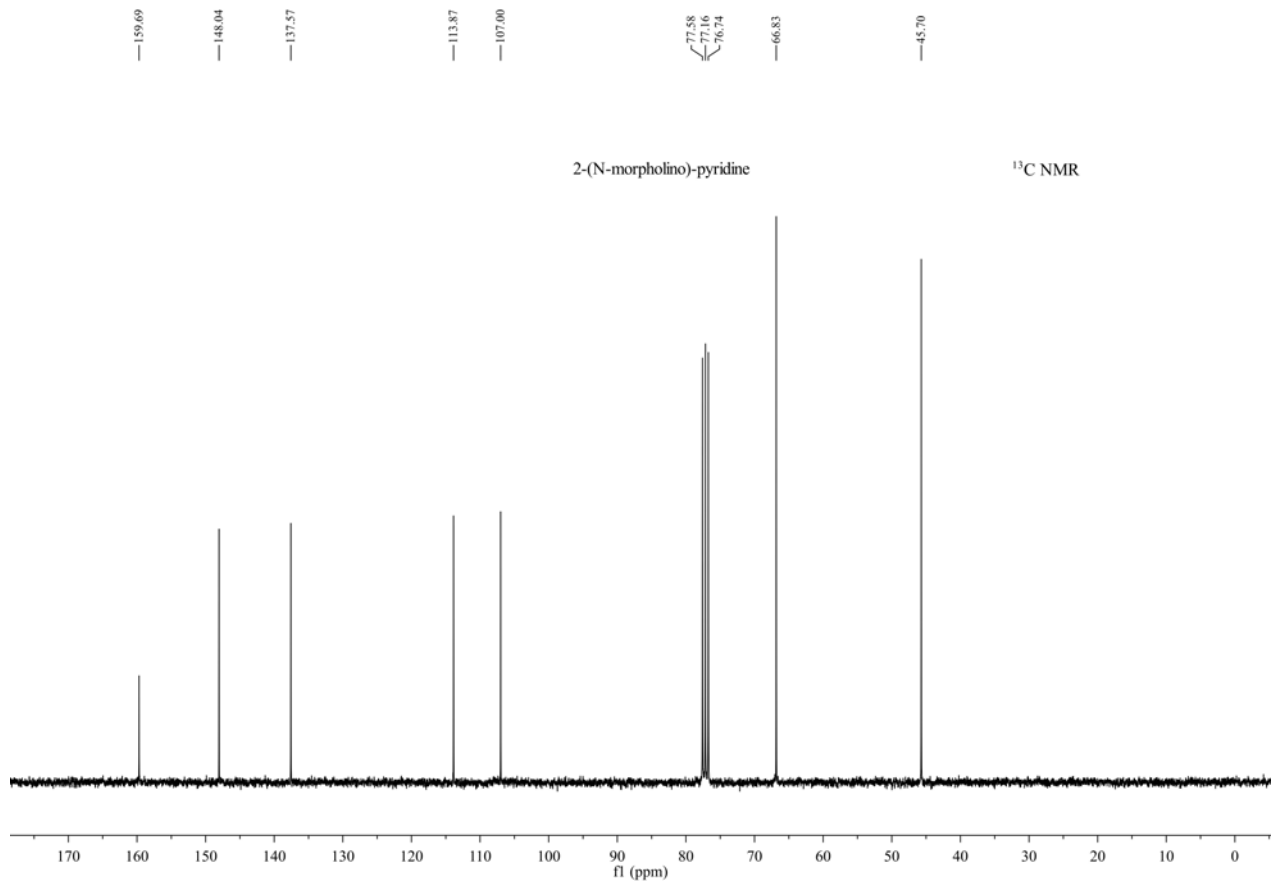

(13) 4-Methyl-1-phenylpiperidine (**4a**)

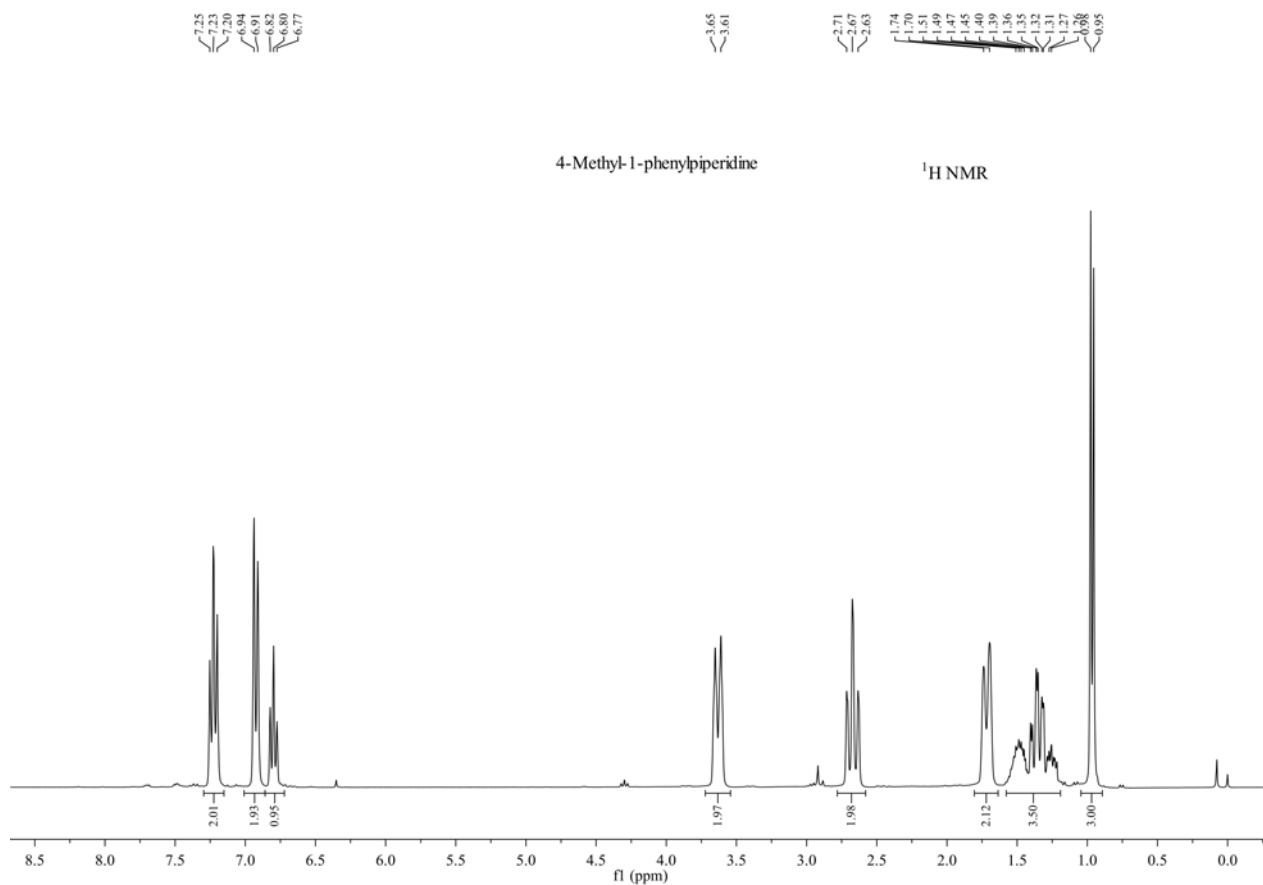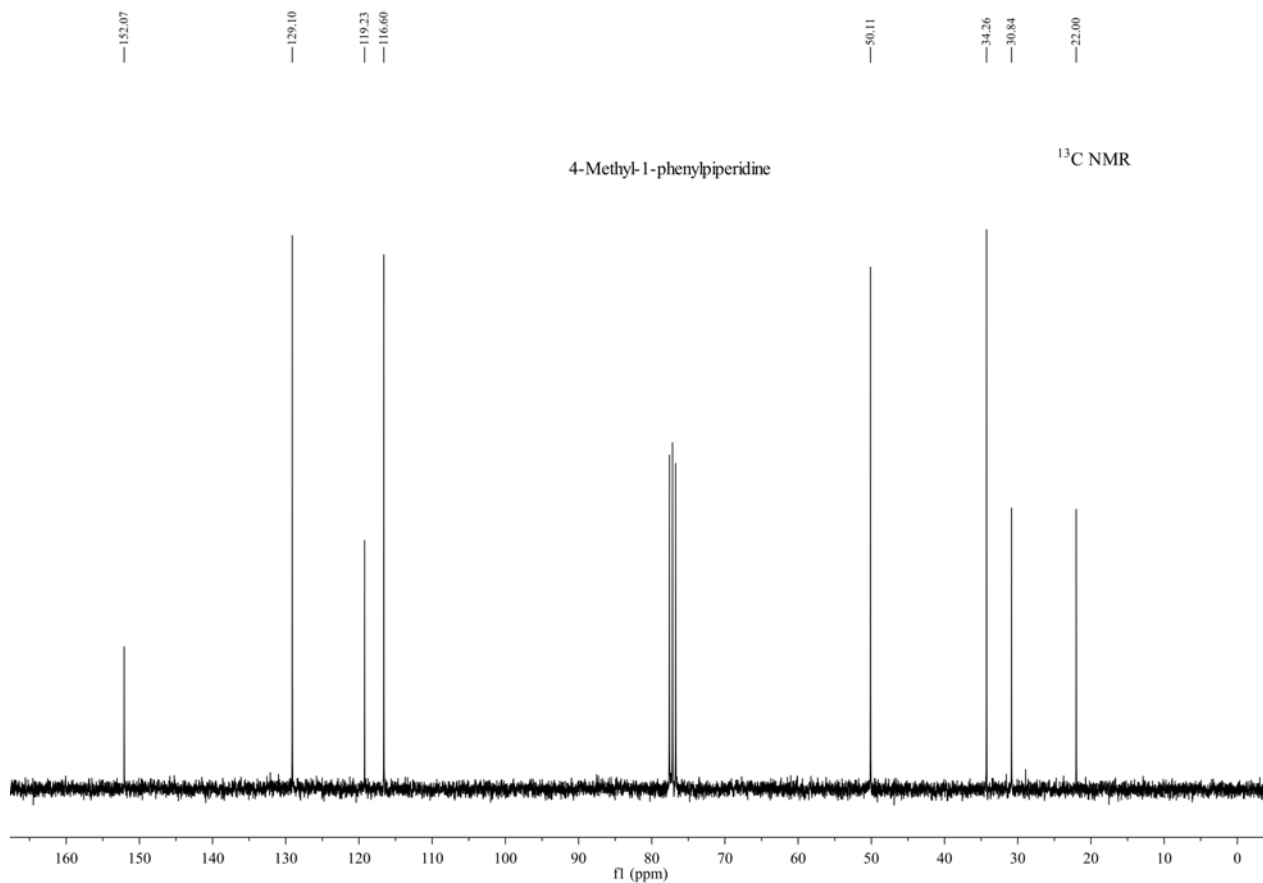

(14) 1-Phenyl-4-(pyridin-2-yl)piperazine (**4b**)

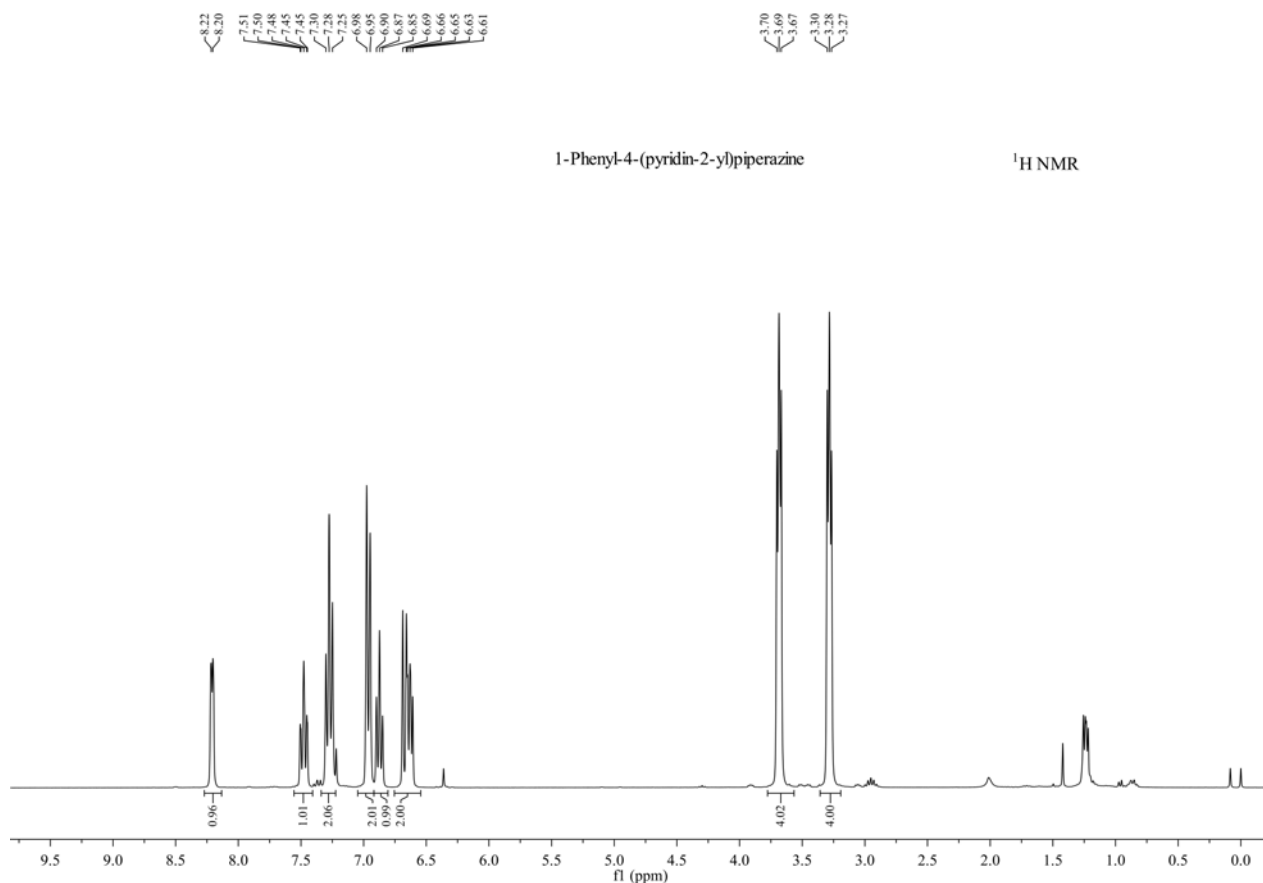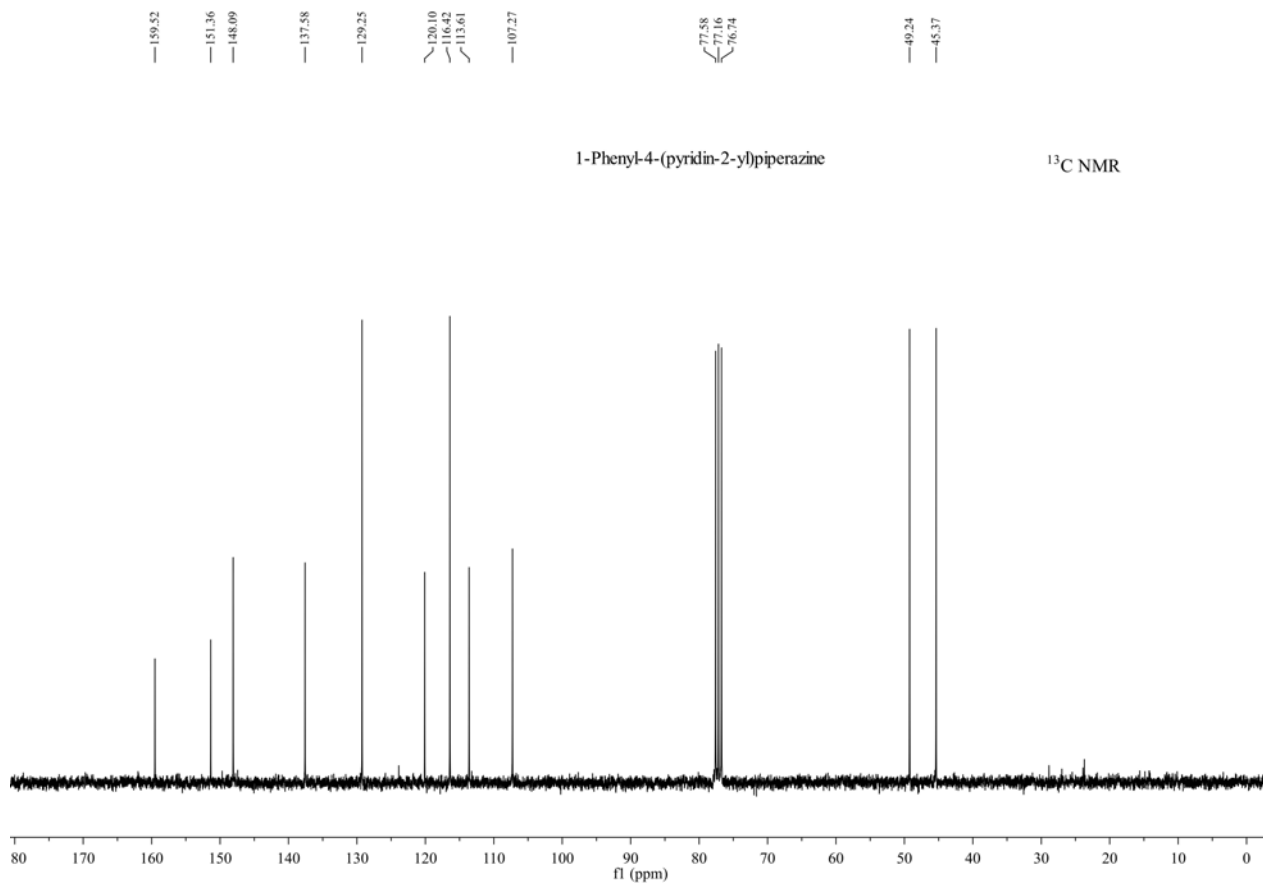

(15) 1-Phenylazepane (**4c**)

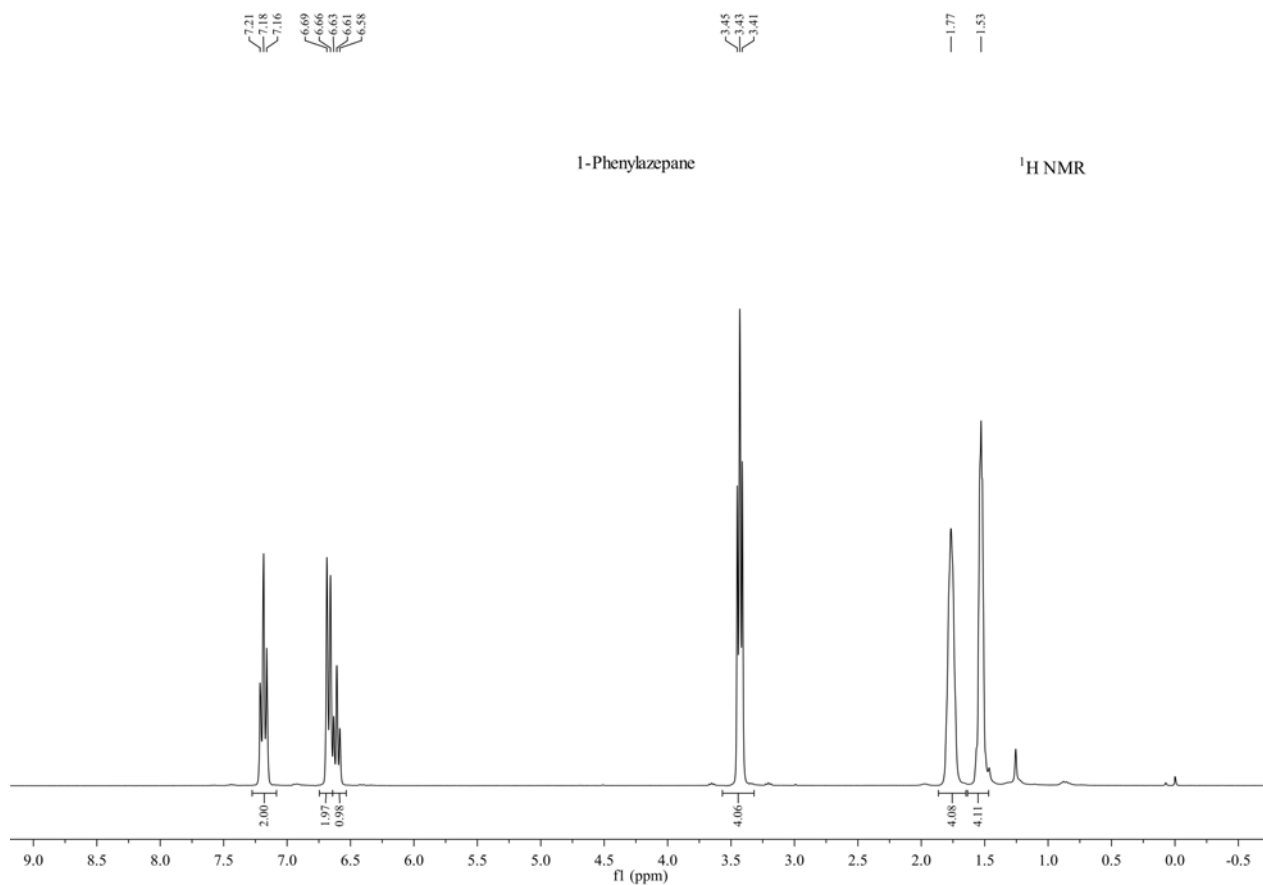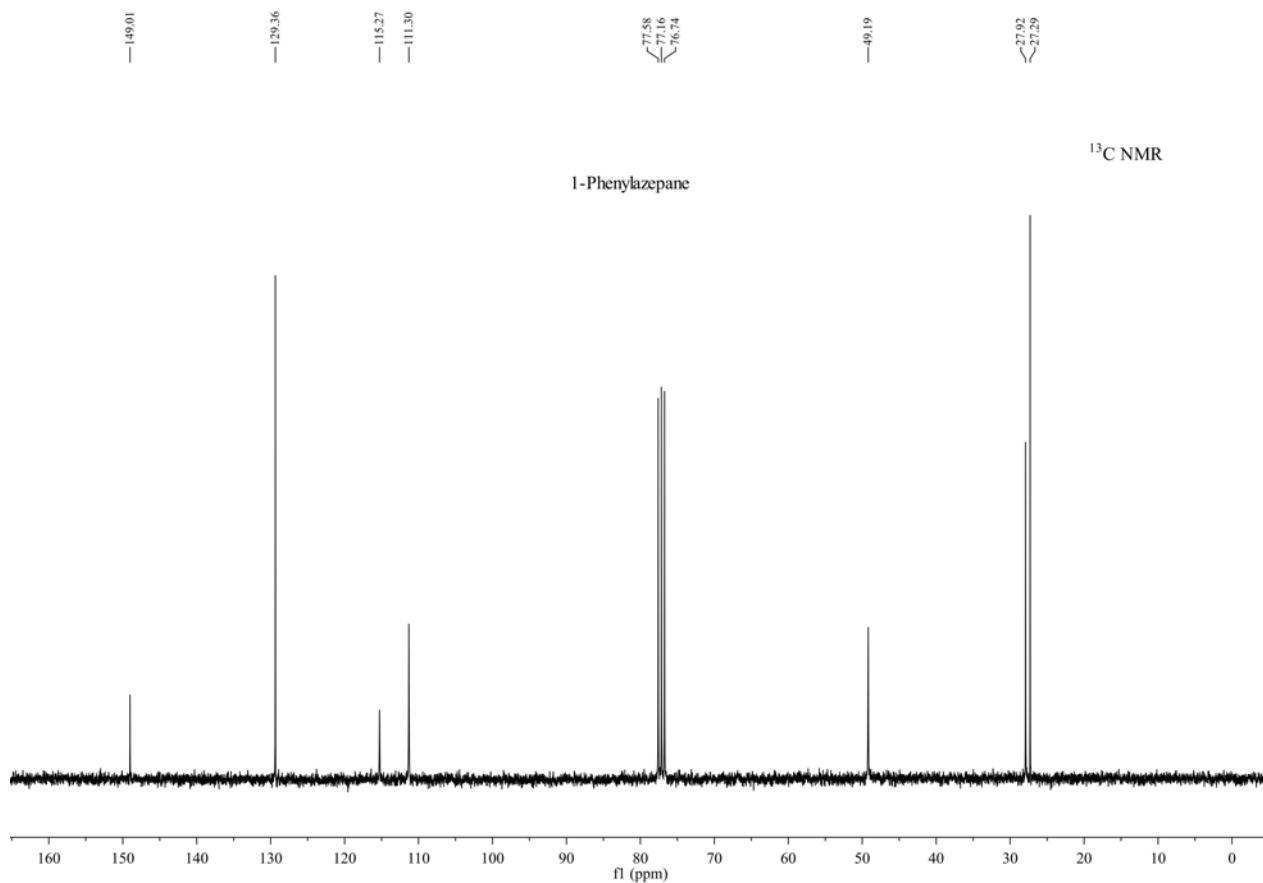



(16) 1-(Pyridin-2-yl)azepane (**4d**)

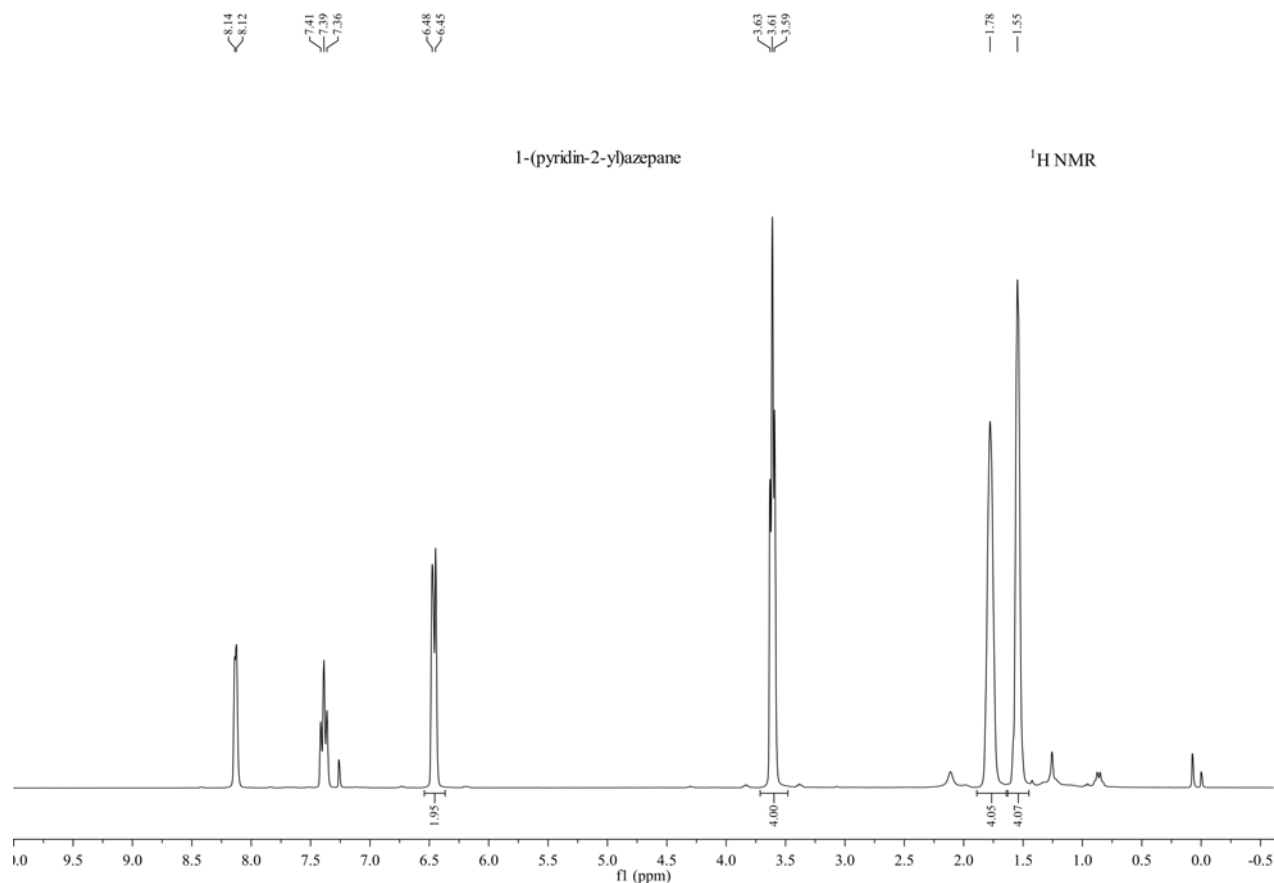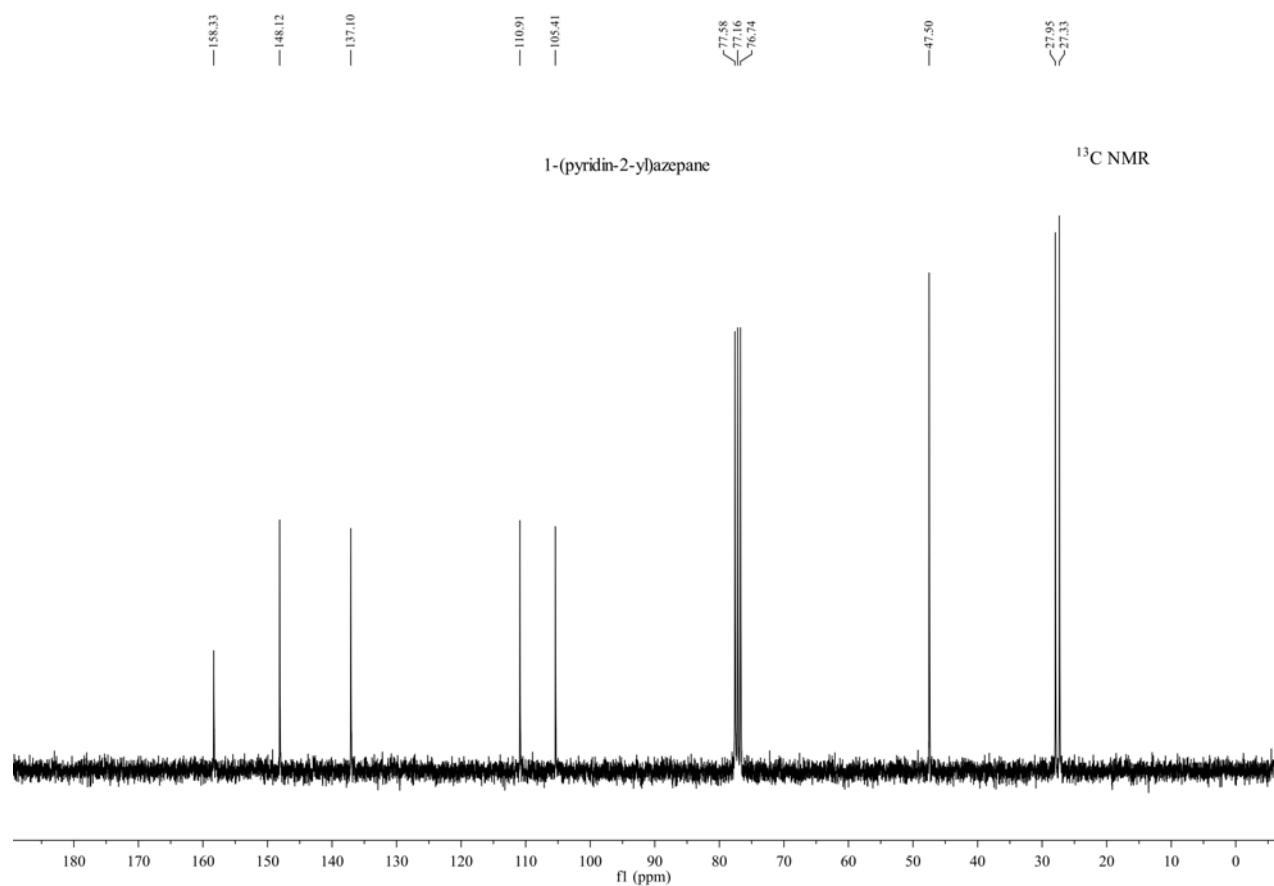

(17) 4-(4-Trifluoromethylphenyl)pyrrolidine (**4e**)

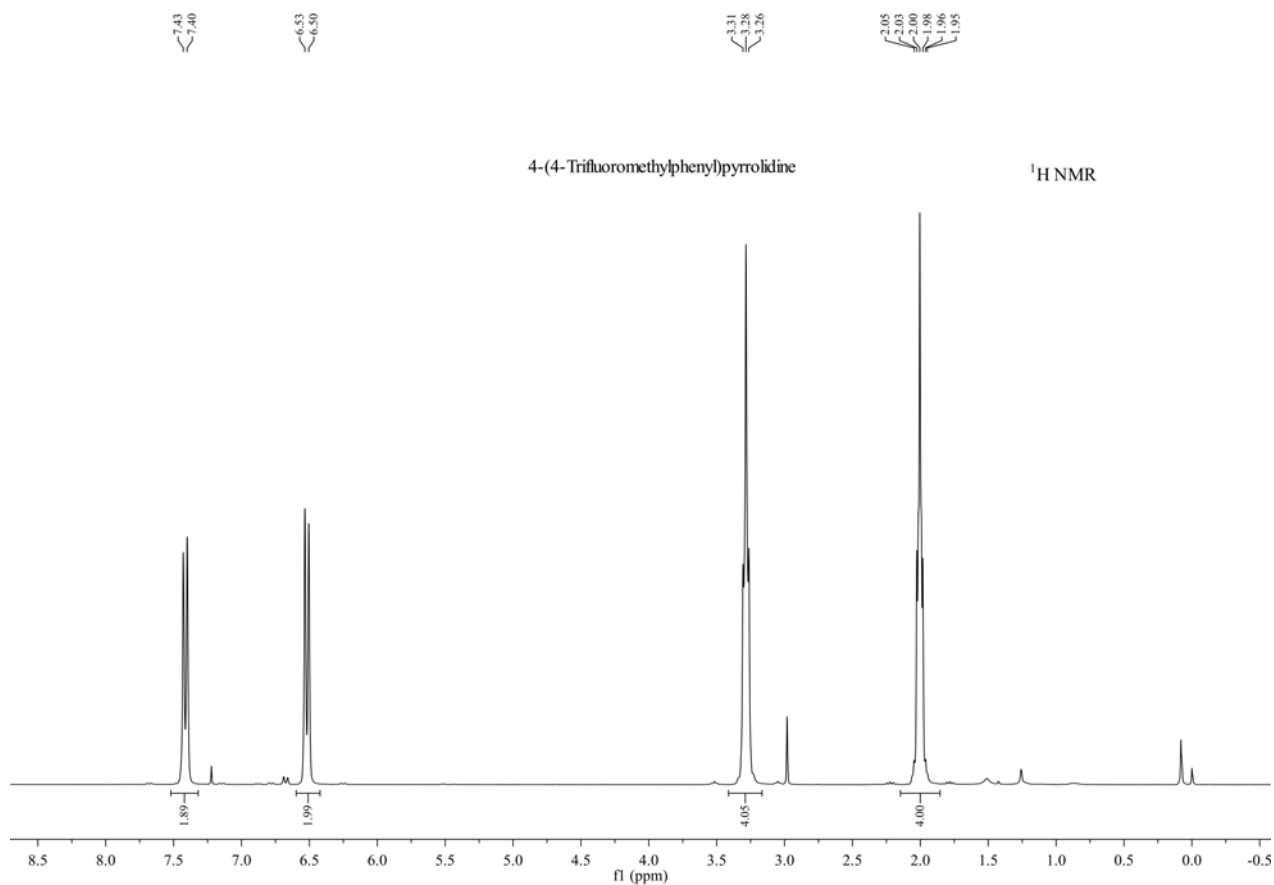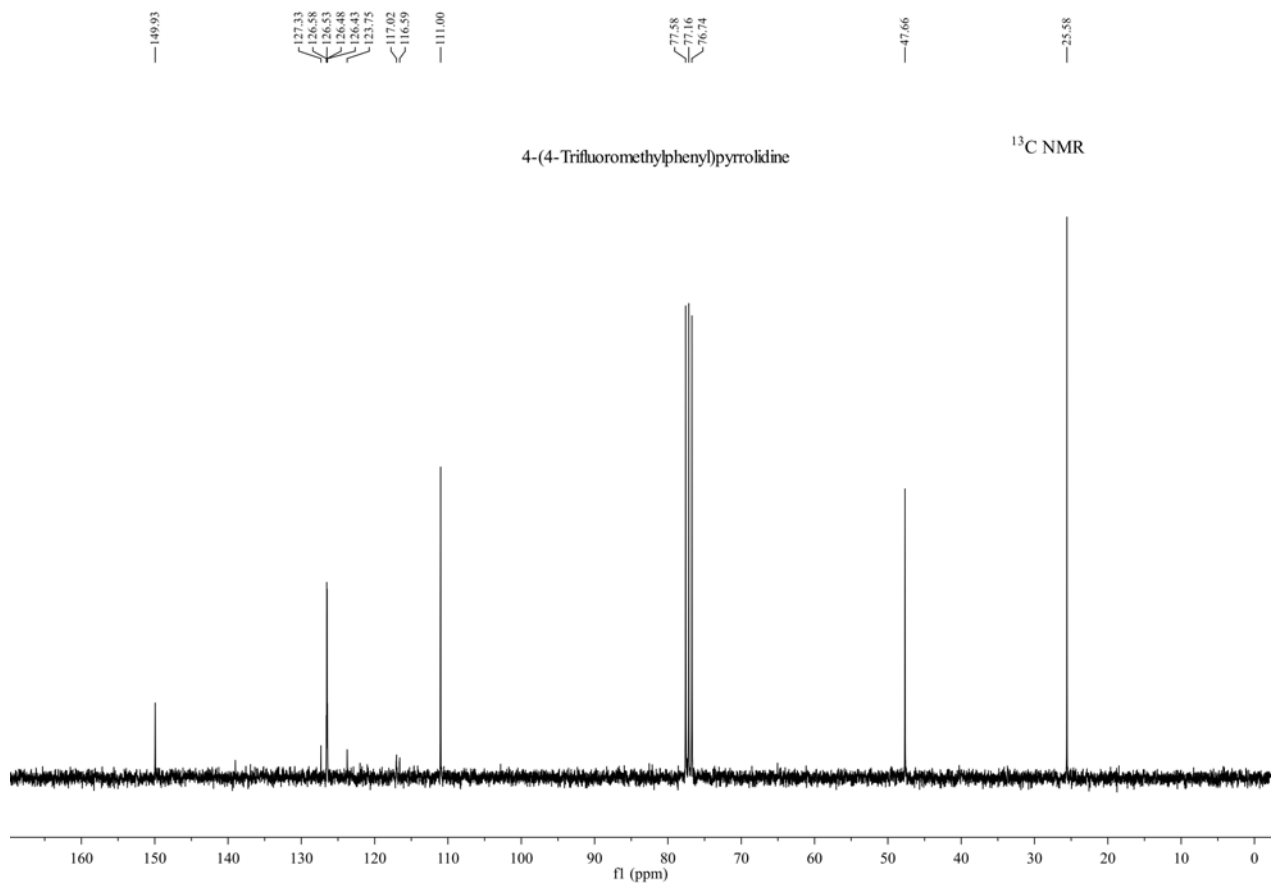

(18) *N,N*-Dibenzylaniline (**4f**)

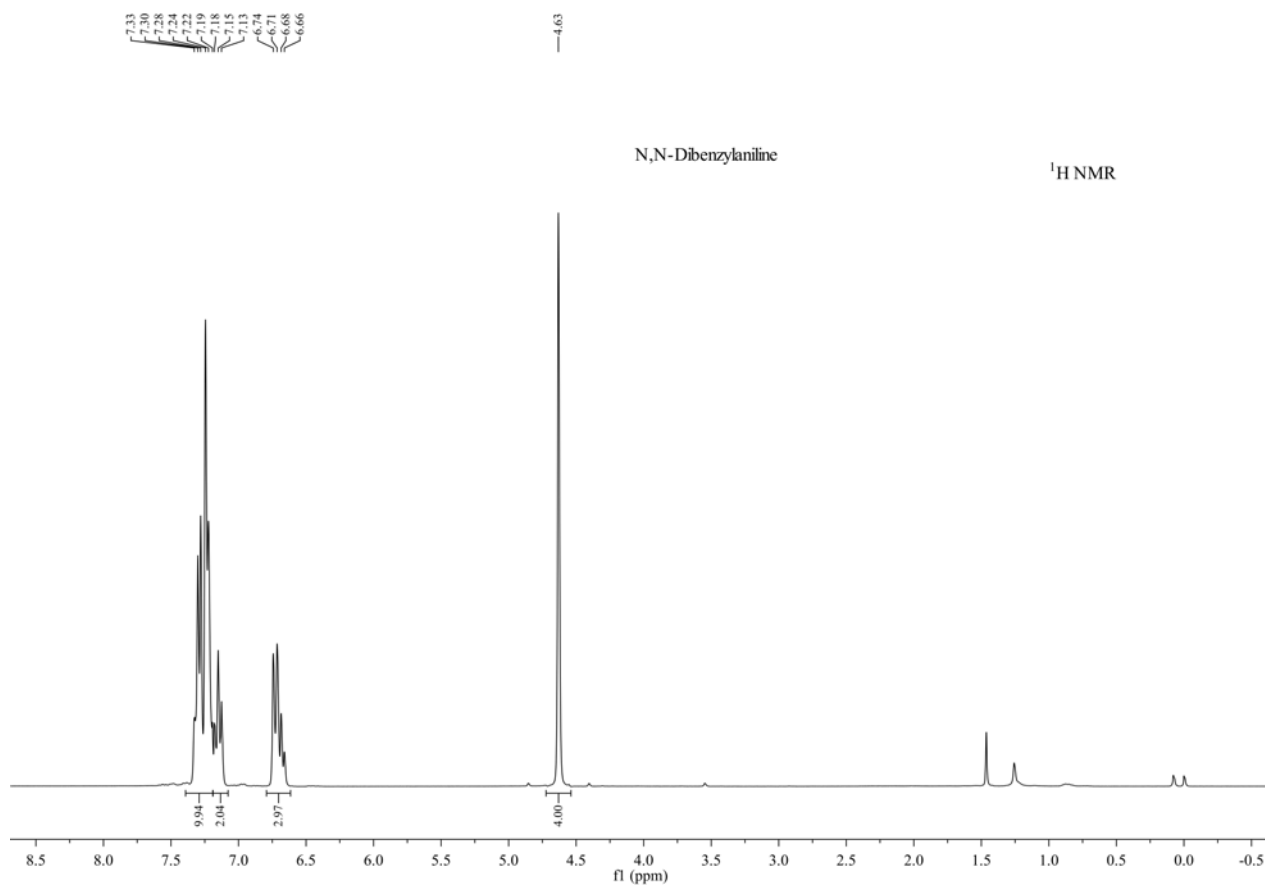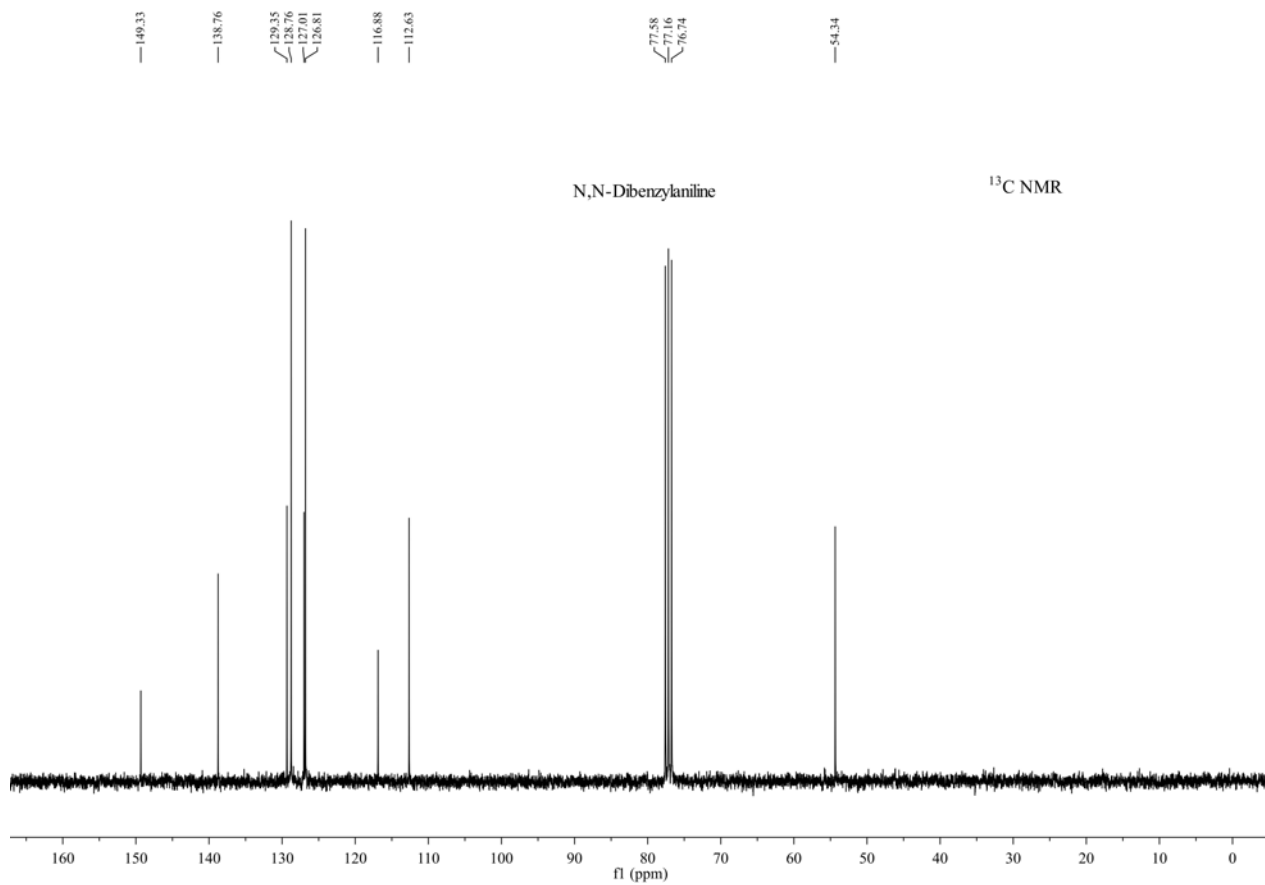

(19) *N,N*-Dibenzylpyridin-2-amine (**4g**)

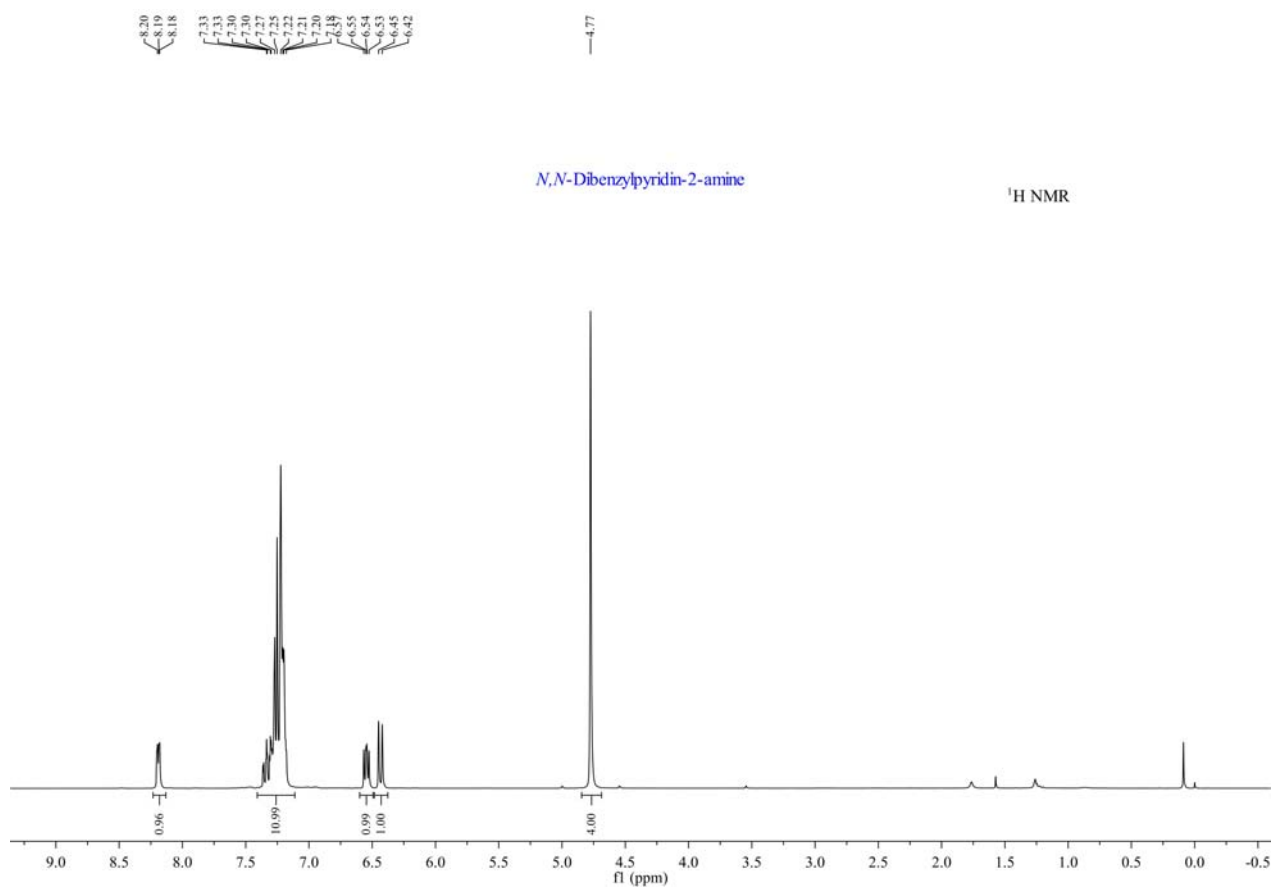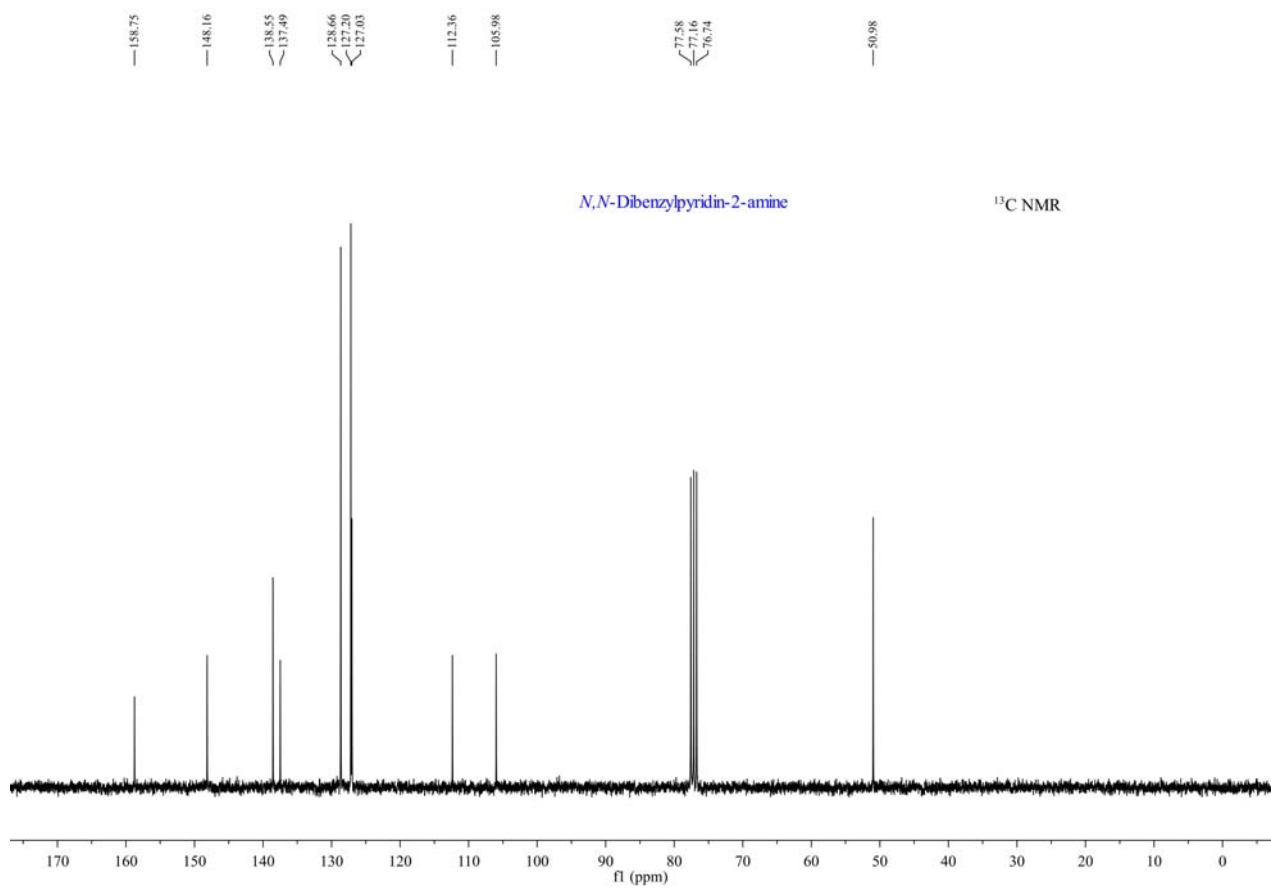

(20) *N,N*-Dibutyl-4-(trifluoromethyl)aniline (**4h**)

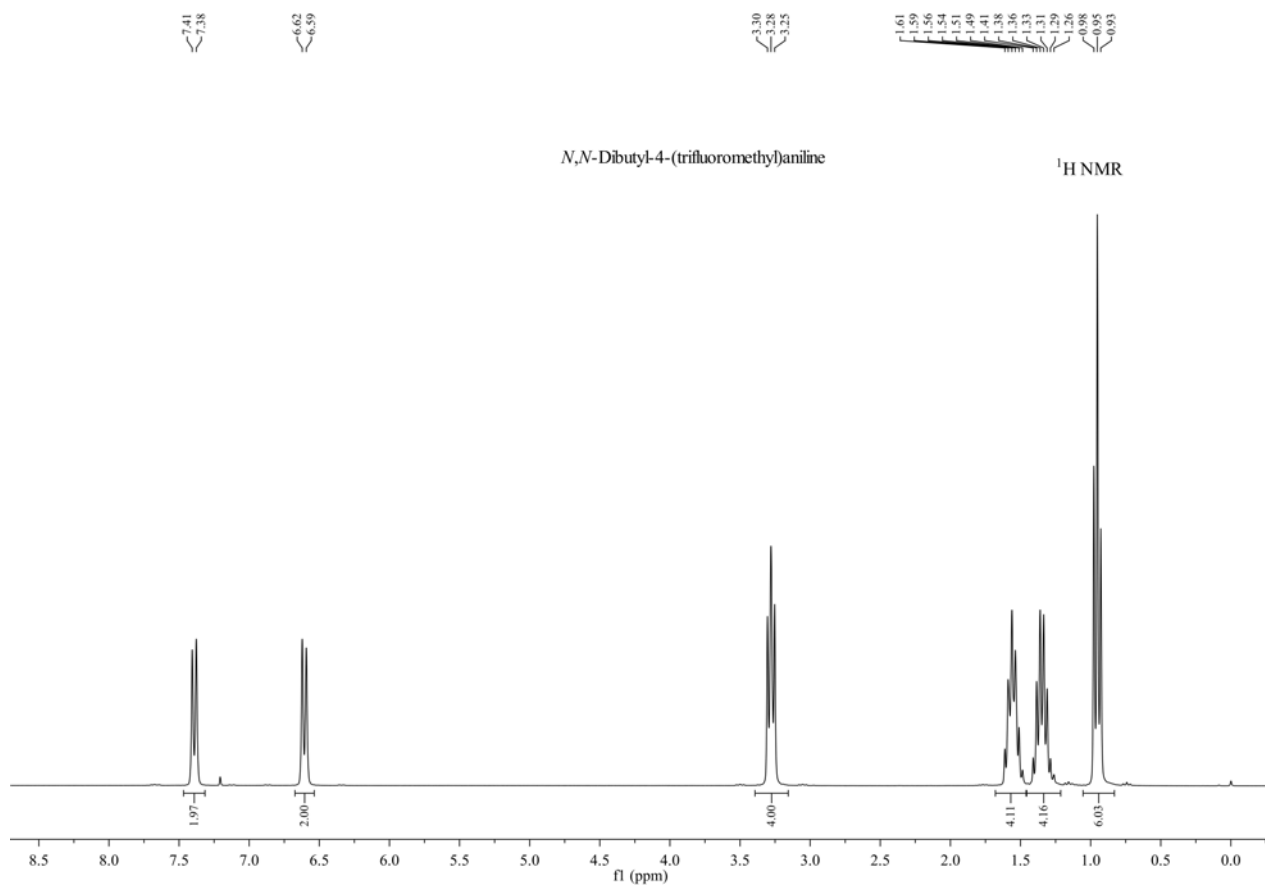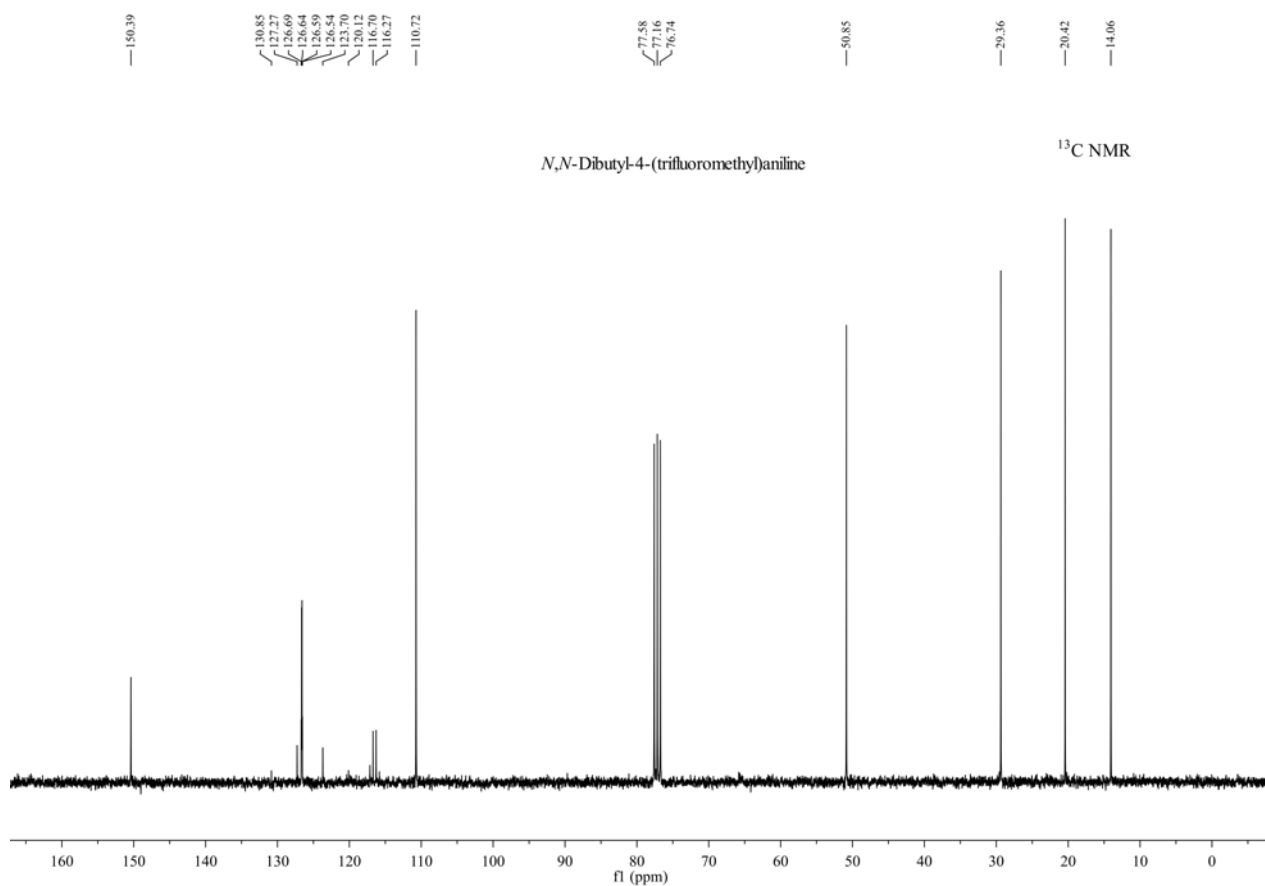

(21) *N*-Benzyl-*N*-methylaniline (**4i**)

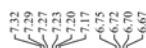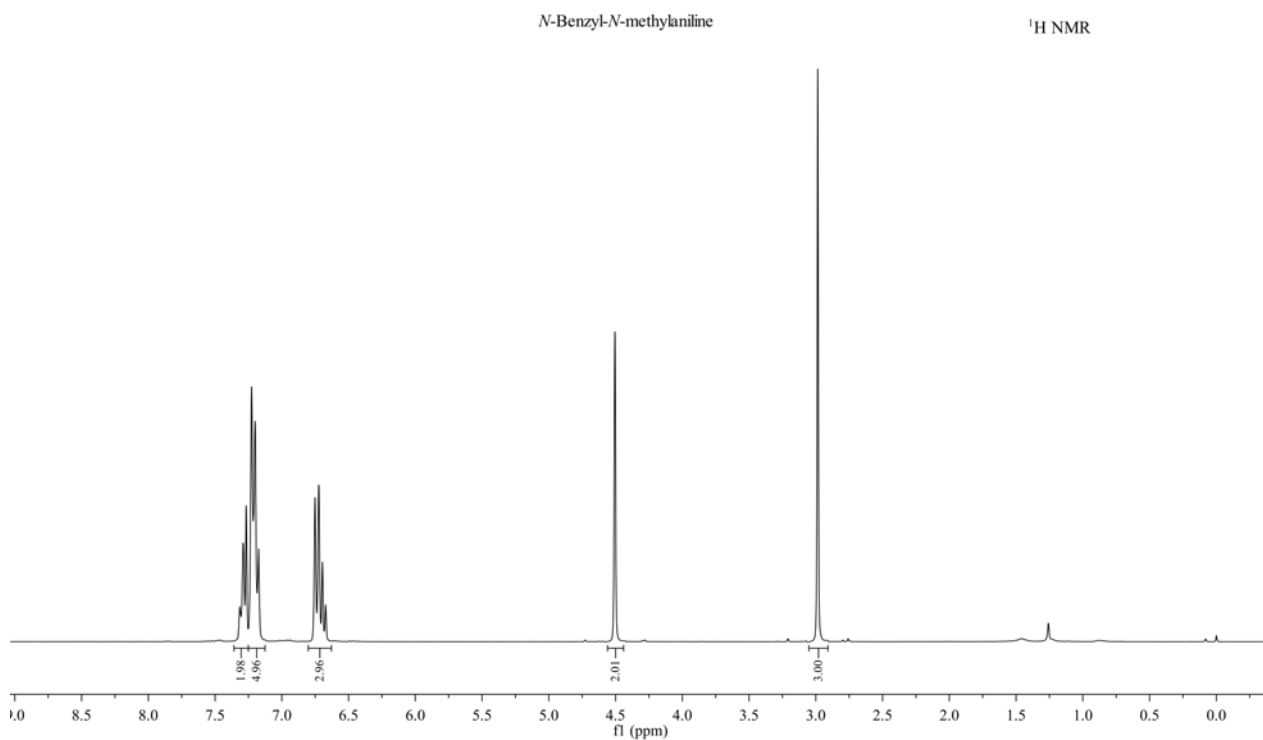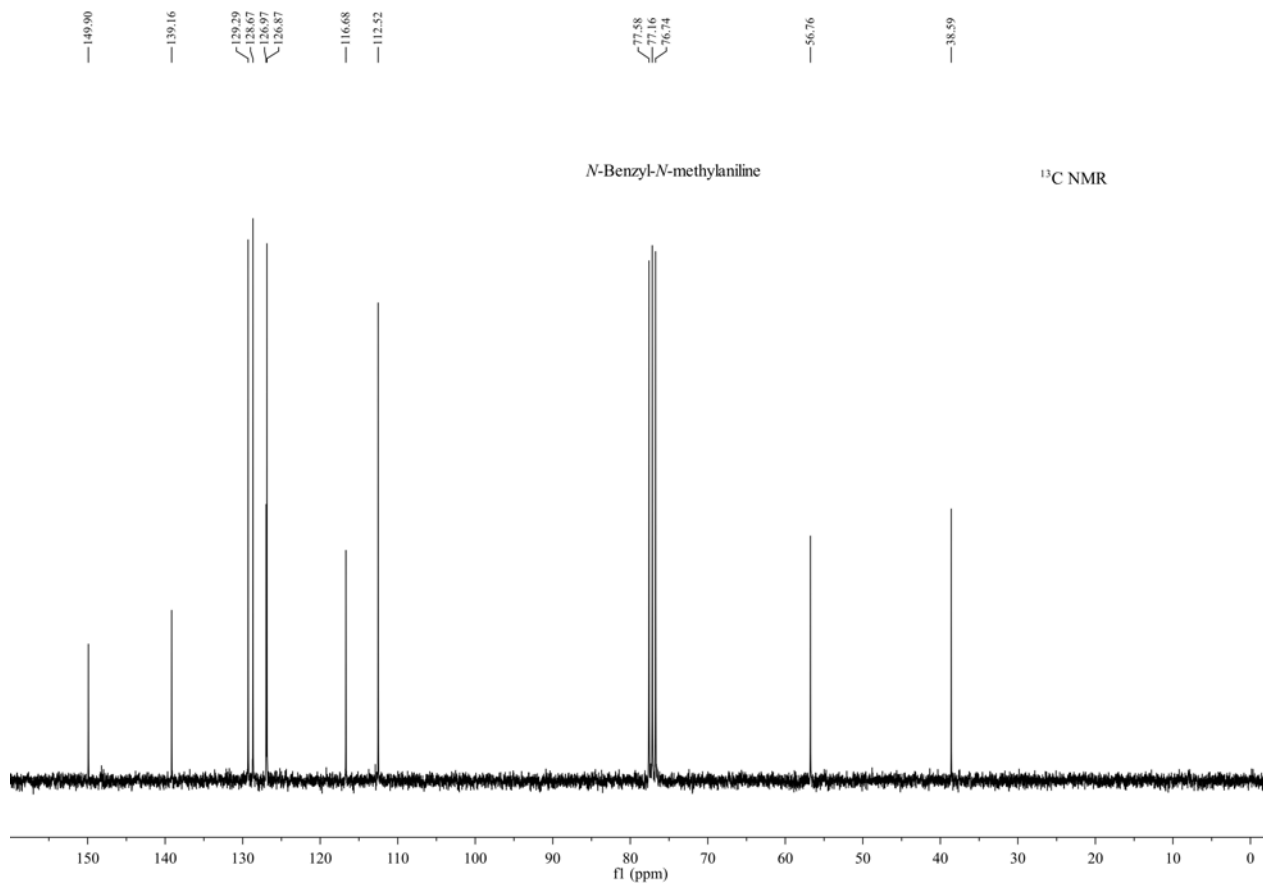

(22) *N*-Benzyl-*N*-methyl-4-(trifluoromethyl)aniline (**4j**)

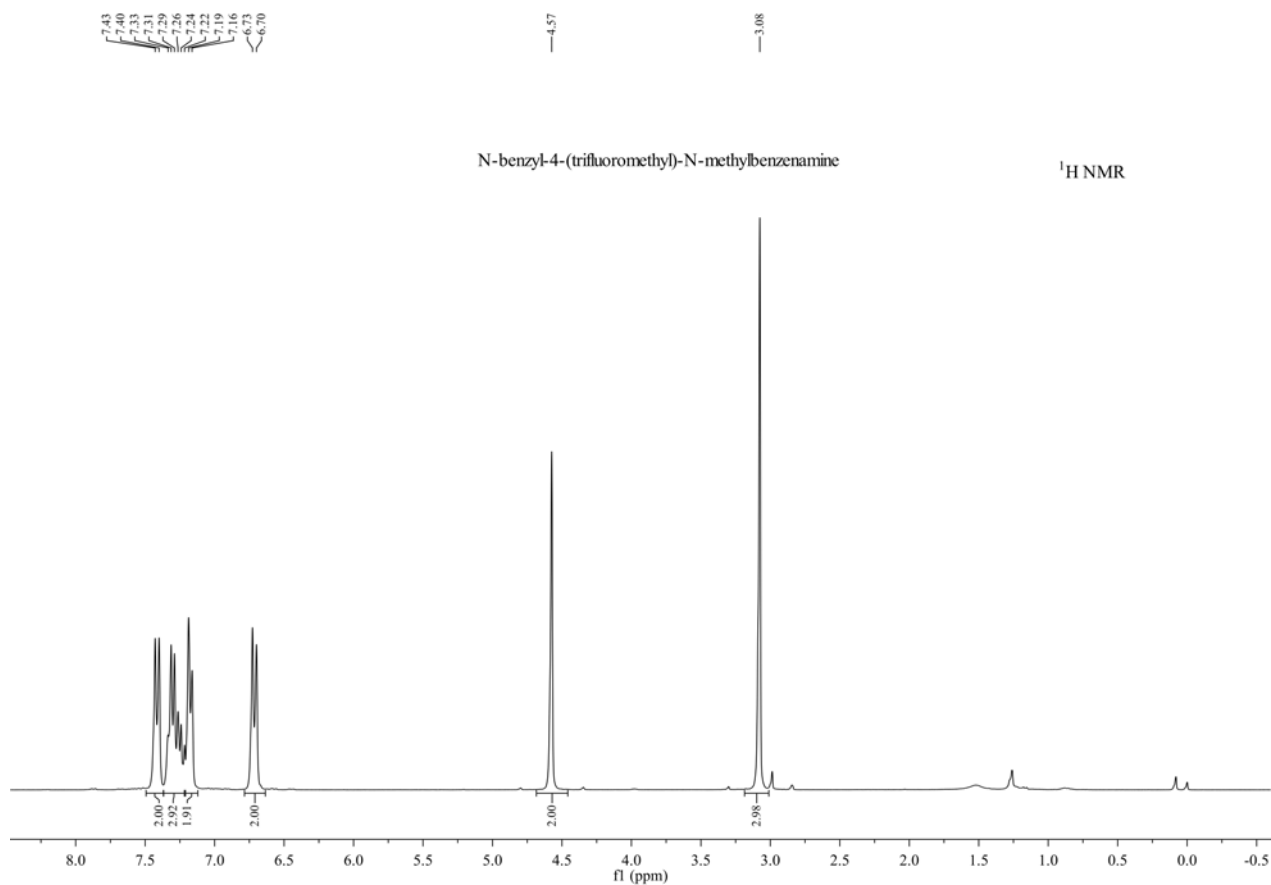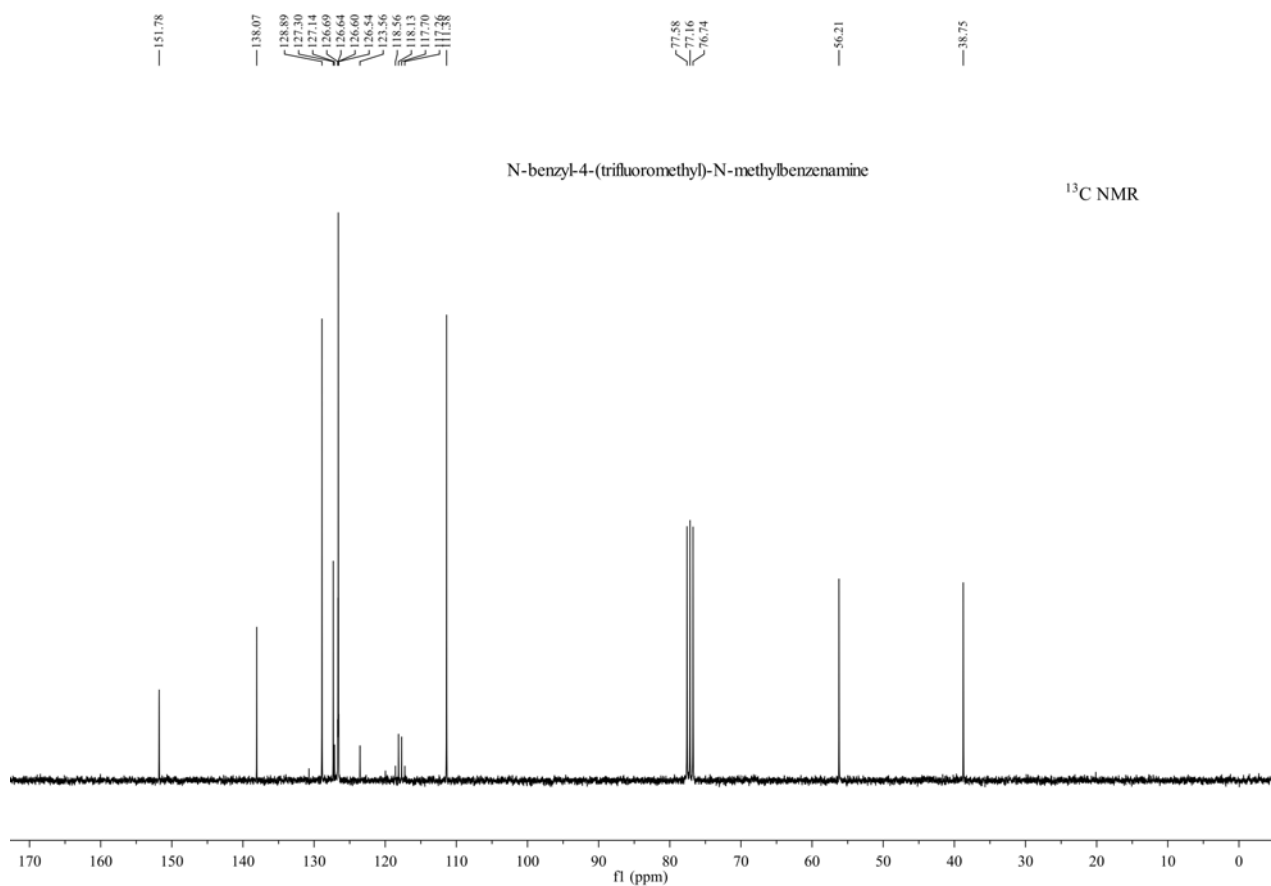

(23) *N*-Benzyl-*N*-methyl-pyridin-2-amine (**4k**)

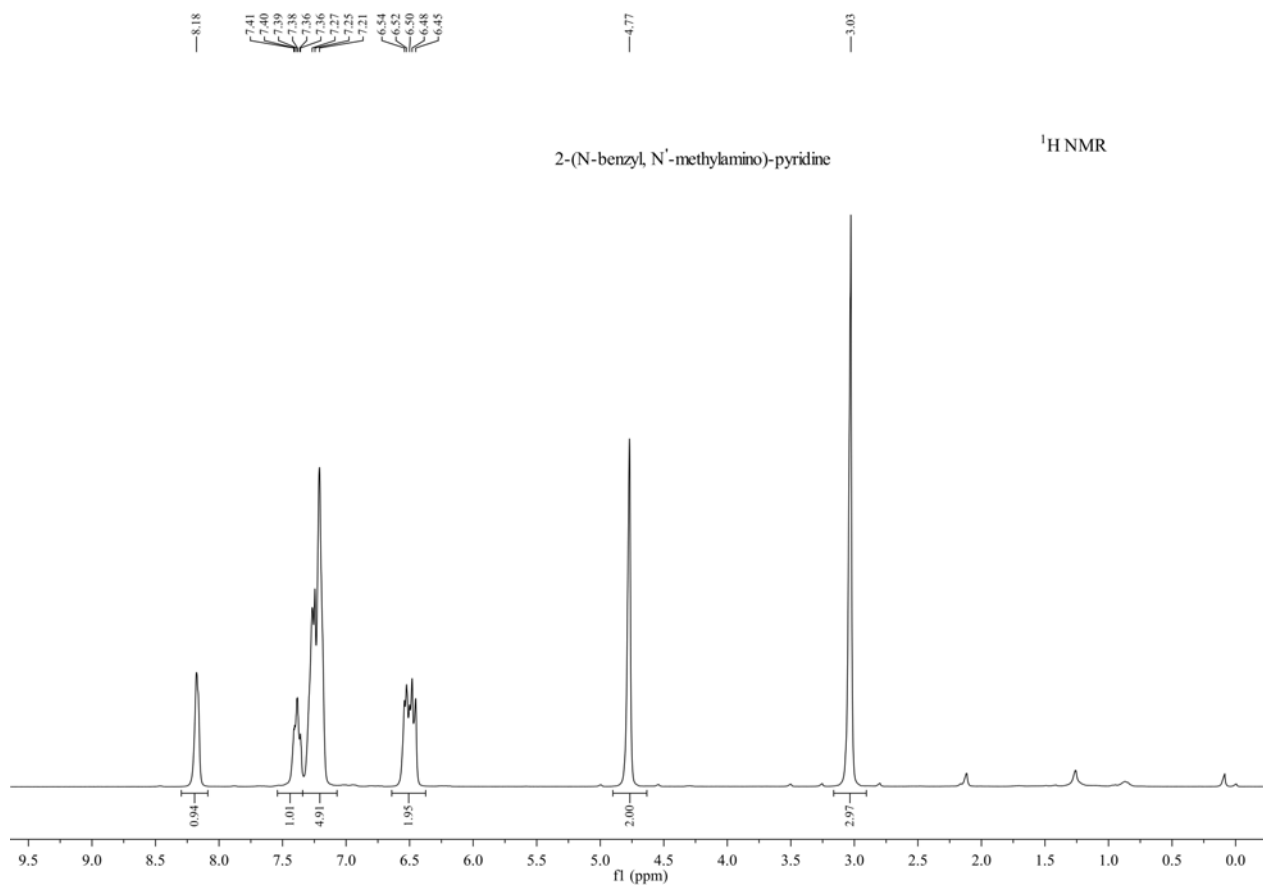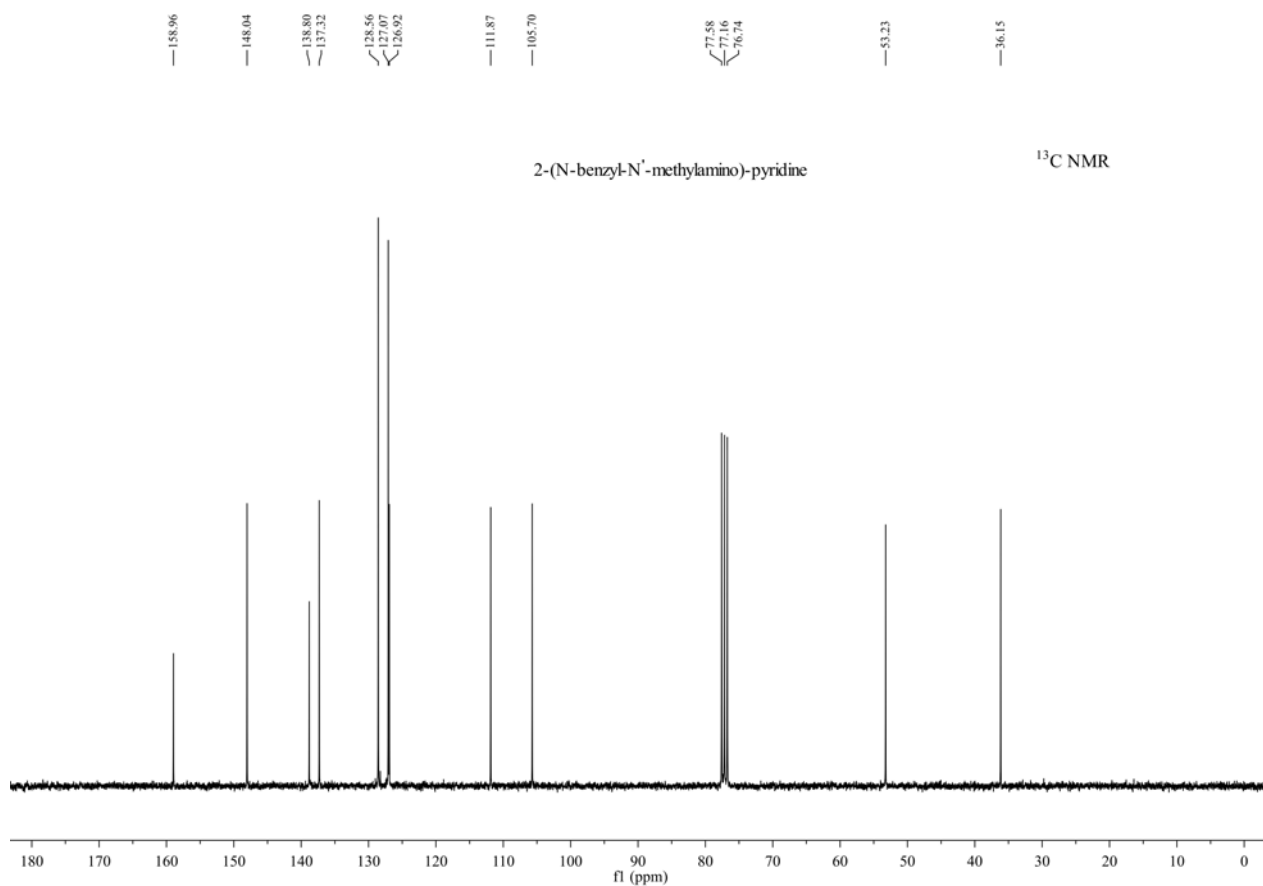



(24) *N*-Methyl-*N*-phenylpyridin-2-amine (**4l**)

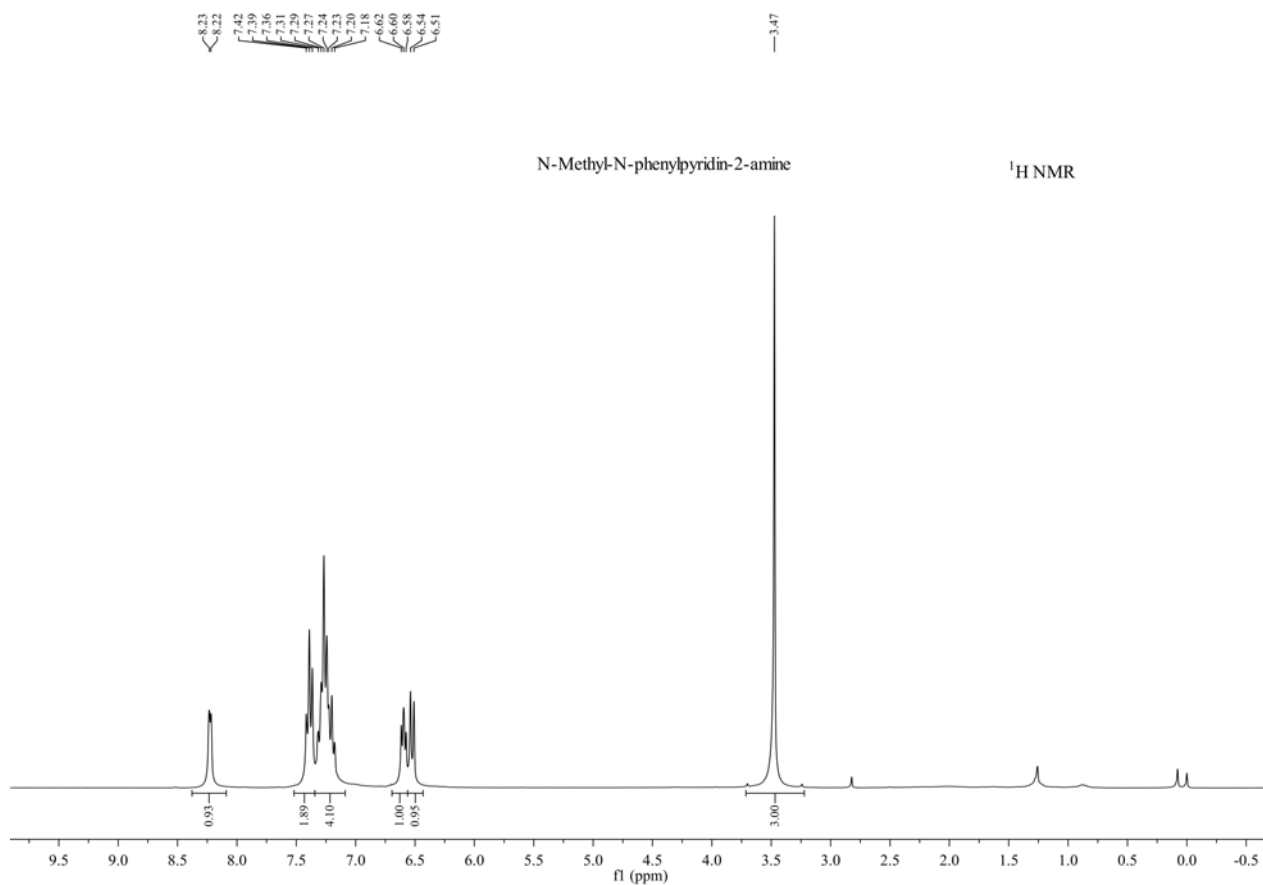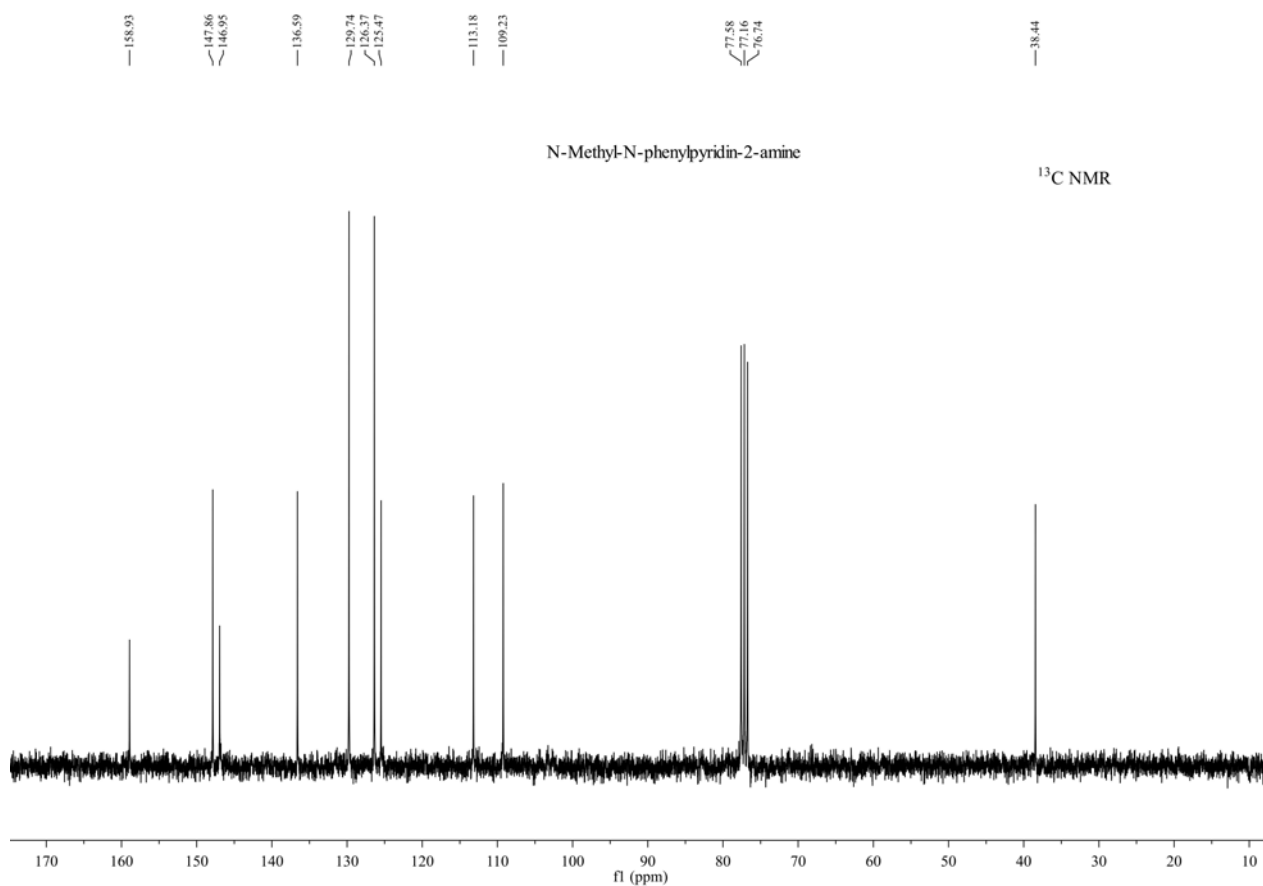

(25) *N*-Phenylaniline (**4m**)

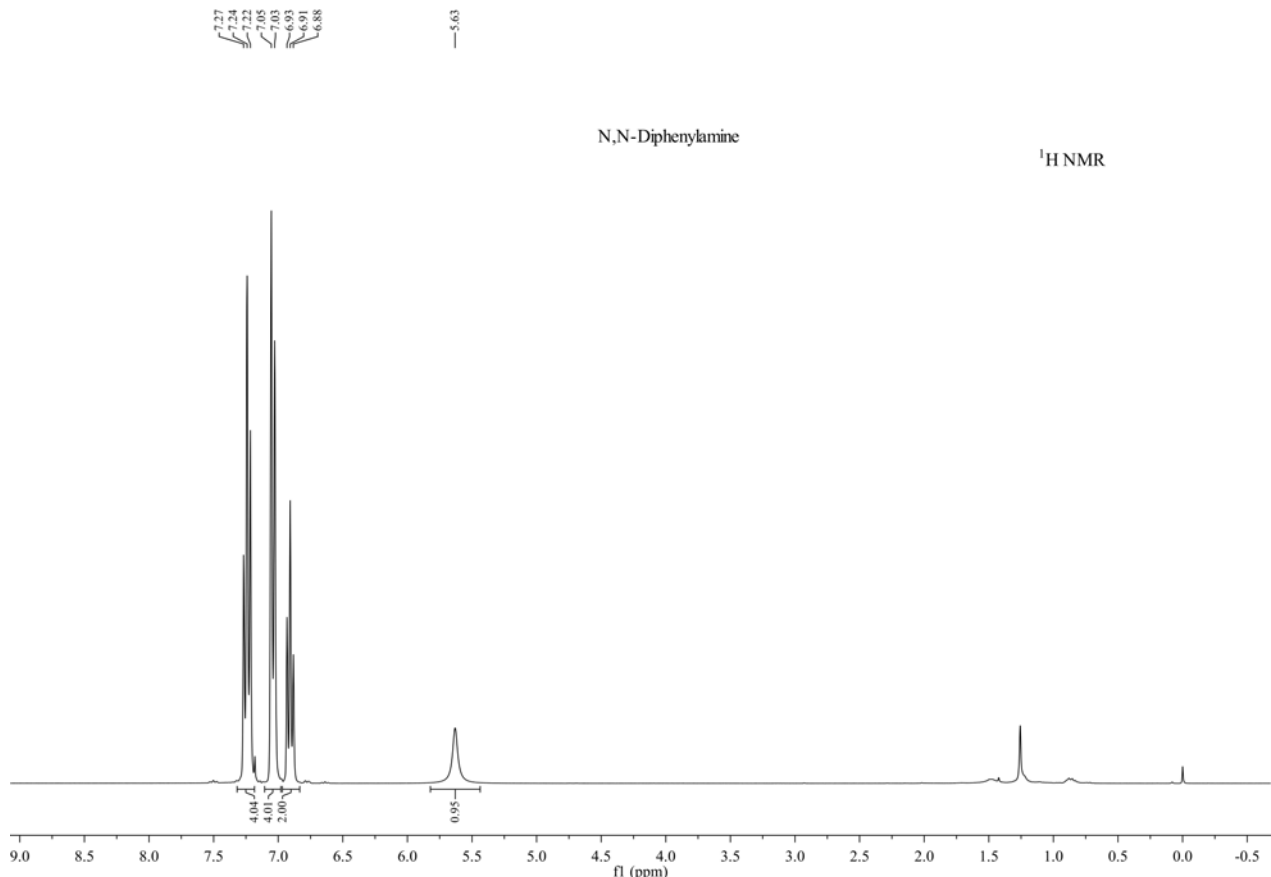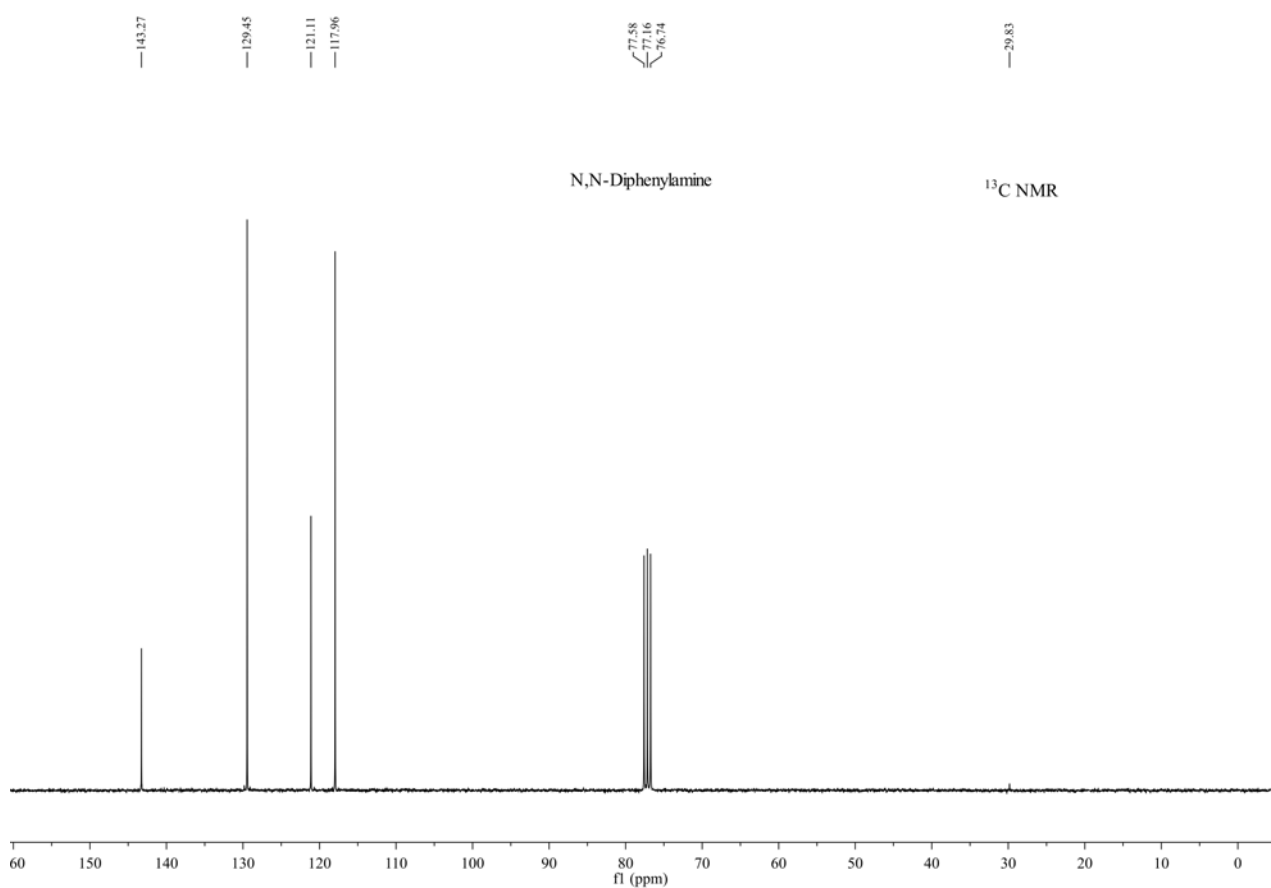

(26) 4-Methoxy-*N*-phenylaniline (**4n**)

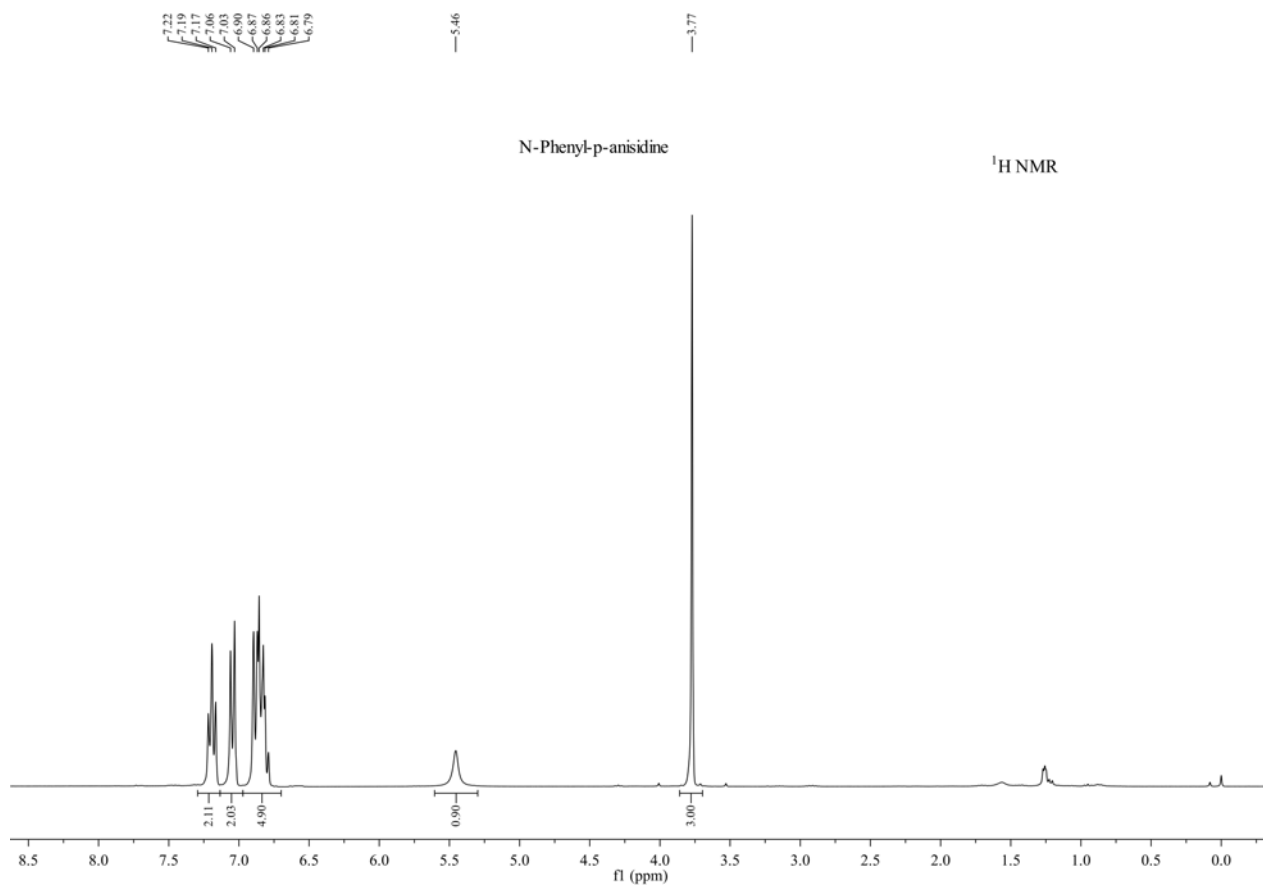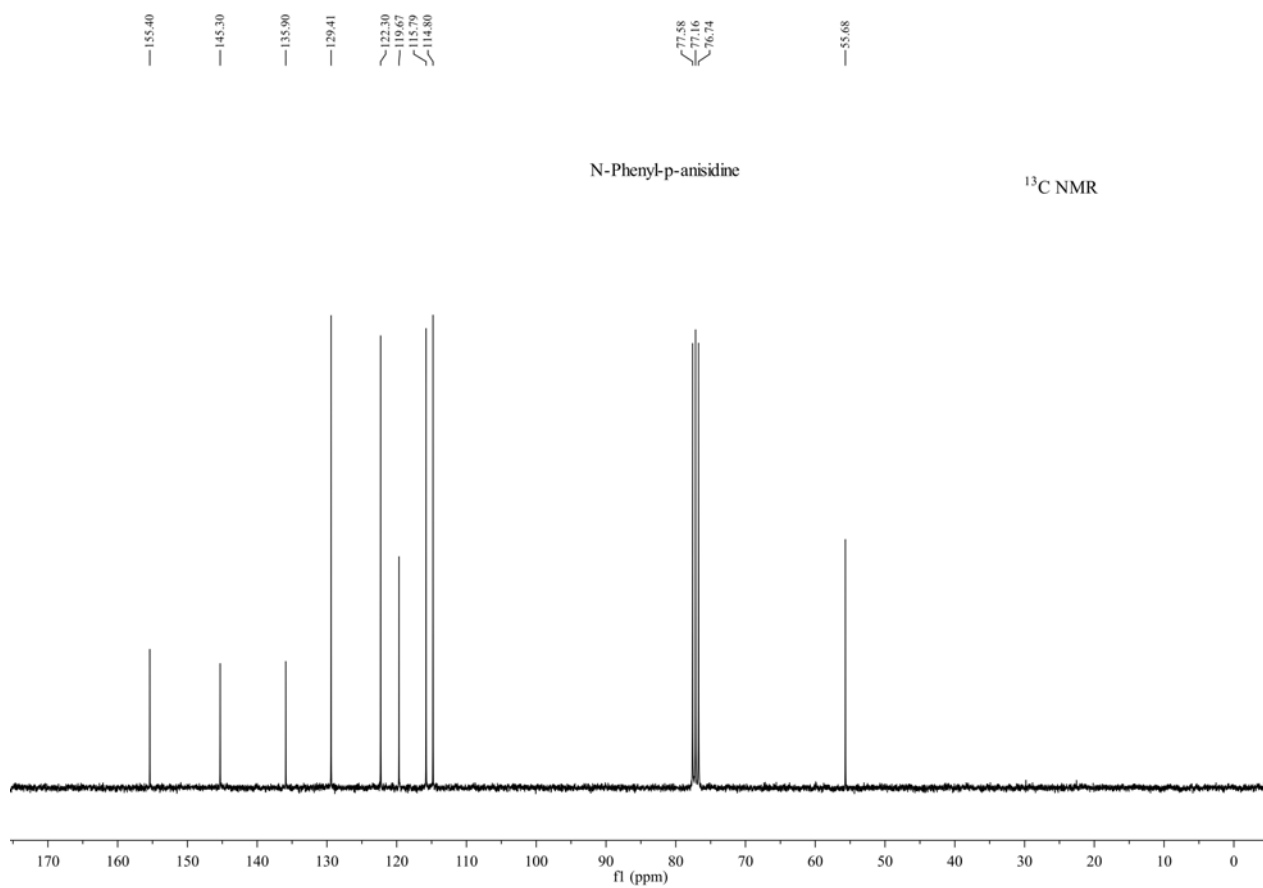

(27) 2,4,6-Trimethyl-N-phenylaniline (**4o**)

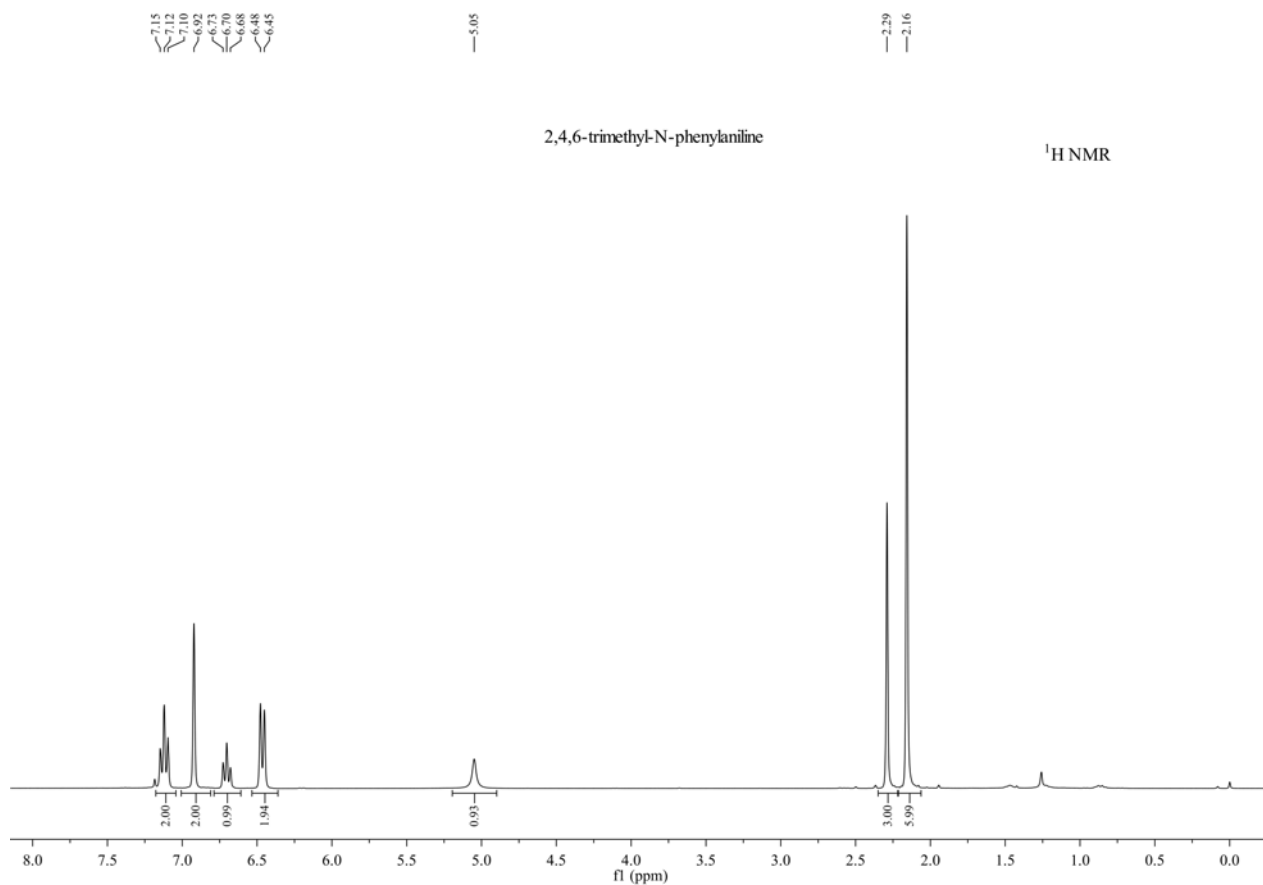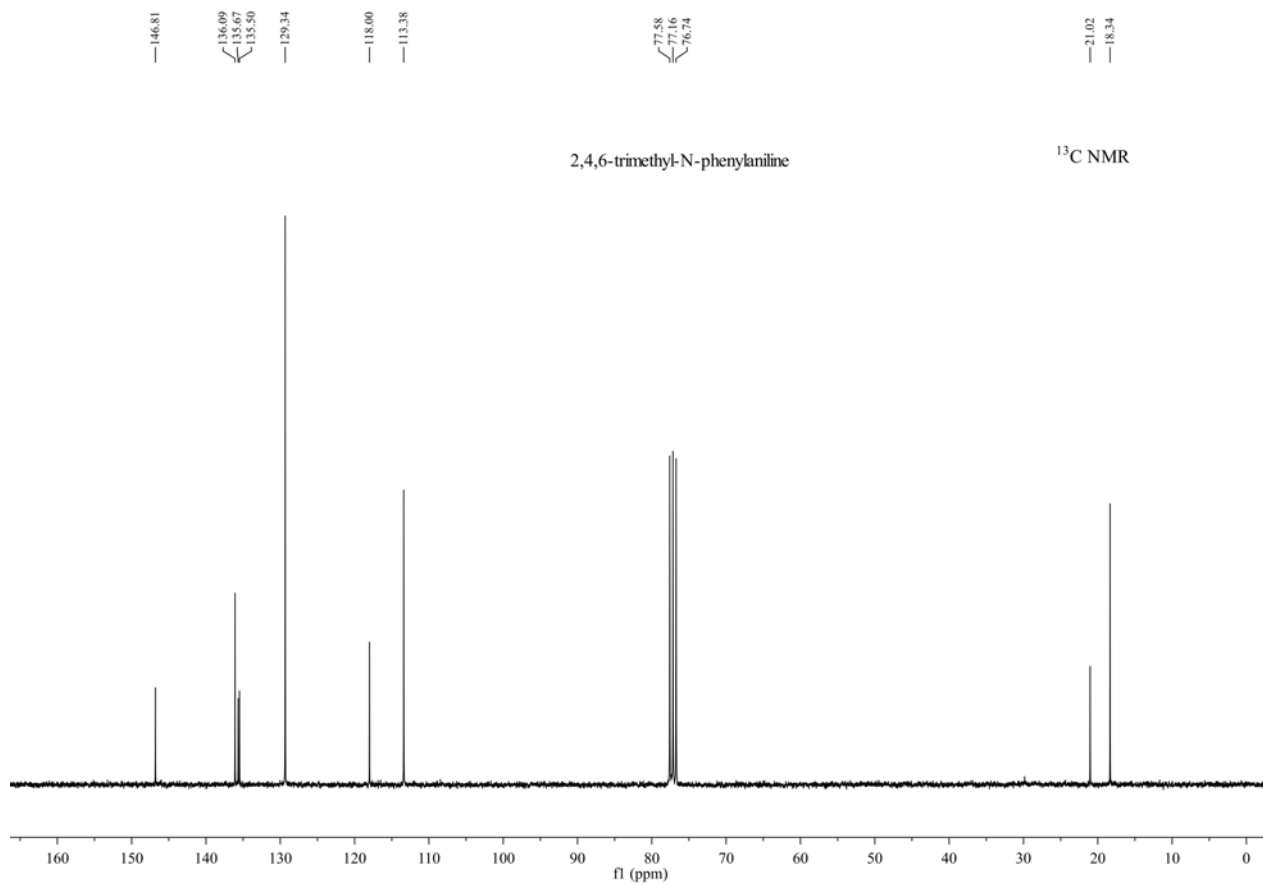

Supplement: c3ob41989d.pdf [file c3ob41989d.pdf]
